# Supplementary material for: Nickel-catalysed alkylation of C(sp3)–H bonds with alcohols: direct access to functionalised N-heteroaromatics
Source: Royal Society of Chemistry journal article supplement (doi:10.1039/c8cc06370b), 2018-01-01

# Nickel-Catalysed Alkylation of C(sp<sup>3</sup>)-H Bond with Alcohols: Direct Access to Functionalised *N*-Heteroaromatics

Mari Vellakkaran,<sup>‡</sup> Jagadish Das,<sup>‡</sup> Sourajit Bera, and Debasis Banerjee\*

Department of Chemistry  
Laboratory of Catalysis and Organic Synthesis  
Indian Institute of Technology Roorkee, Roorkee-247667, India  
[E-mail: dbane.fcy@iitr.ac.in](mailto:dbane.fcy@iitr.ac.in)

## Table of Contents

|                                                                                 |     |
|---------------------------------------------------------------------------------|-----|
| General Experimental                                                            | S2  |
| General Experimental Procedure                                                  | S2  |
| Alkylation of 2-methylquinolines with alcohols                                  | S3  |
| Analytical Data                                                                 | S15 |
| References                                                                      | S21 |
| <sup>1</sup> H NMR, <sup>13</sup> C NMR and HRMS Spectra for selected compounds | S22 |

### [1.1] General Experimental Details:

All solvents and reagents were used, as received from the suppliers. TLC was performed on Merck Kiesel gel 60, F<sub>254</sub> plates with the layer thickness of 0.25 mm. Column chromatography was performed on silica gel (100-200 mesh) using a gradient of ethyl acetate and hexane as mobile phase. <sup>1</sup>H NMR spectral data were collected at, 400 MHz (JEOL), 500 MHz (Bruker) and <sup>13</sup>C NMR were recorded at 100 MHz. <sup>1</sup>H NMR spectral data are given as chemical shifts in ppm followed by multiplicity (s- singlet; d- doublet; t- triplet; q- quartet; m- multiplet), number of protons and coupling constants. <sup>13</sup>C NMR chemical shifts are expressed in ppm. Elemental analysis data were recorded in Vario Micro Cube. GC-MS were recorded using Agilent GC Mass Spectrometer. HRMS (ESI) spectral data were collected using Bruker High Resolution Mass Spectrometer. All the reactions were performed in a close system using Schlenk tube. All nickel salts were purchased from Sigma Aldrich. Nickel(II) bromide (Assay- 98%; CAS Number 13462-88-9; EC Number 236-665-0; Pack Size- No 217891-10G). Potassium *tert*-butoxide was purchased from Avra Synthesis Pvt. Ltd., India. (Purity-98%, CAS No: 865-47-4, Catalog No- ASP2012).

### [1.2] General Procedure for Nickel Catalysed Alkylation of Methylquinolines with Primary Alcohols:

#### Procedure A:

In a 15 mL oven dried Schlenk tube, quinaldine (0.25 mmol), *t*-BuOK (0.25 mmol), NiBr<sub>2</sub> (10 mol%), Phen (50 mol%), and alcohols (0.50 mmol) were added followed by toluene 2.0 mL under an atmosphere of N<sub>2</sub> and the reaction mixture was heated at 140 °C for 24 h in closed system. The reaction mixture was cooled to room temperature and 3.0 mL of ethyl acetate was added and concentrated *in vacuo*. The residue was purified by column chromatography using a gradient of hexane and ethyl acetate (eluent system) to afford the pure product.

#### Procedure B:

In a 15 mL oven dried Schlenk tube, quinaldine (0.25 mmol), *t*-BuOK (0.375 mmol), NiBr<sub>2</sub> (10 mol%), Phen (50 mol%), and alcohols (0.50 mmol) were added followed by toluene 2.0 mL under an atmosphere of N<sub>2</sub> and the reaction mixture was heated at 140 °C for 24 h in close system. The reaction mixture was cooled to room temperature and 3.0 mL of ethyl acetate was added and concentrated *in vacuo*. The residue was purified by column

chromatography using a gradient of hexane and ethyl acetate (eluent system) to afford the pure product.

### **Procedure C:**

In a 15 mL oven dried Schlenk tube, quinaldine (0.25 mmol), *t*-BuOK (0.50 mmol), NiBr<sub>2</sub> (20 mol%), Phen (100 mol%), and alcohols (1.0 mmol) were added followed by toluene 2.0 mL under an atmosphere of N<sub>2</sub> and the reaction mixture was heated at 140 °C for 24 h in close system. The reaction mixture was cooled to room temperature and 3.0 mL of ethyl acetate was added and concentrated *in vacuo*. The residue was purified by column chromatography using a gradient of hexane and ethyl acetate (eluent system) to afford the pure product.

### **[1.3] Alkylation of 2-methylquinolines with alcohols:**

**Table S1:** Screening of catalyst<sup>a</sup>

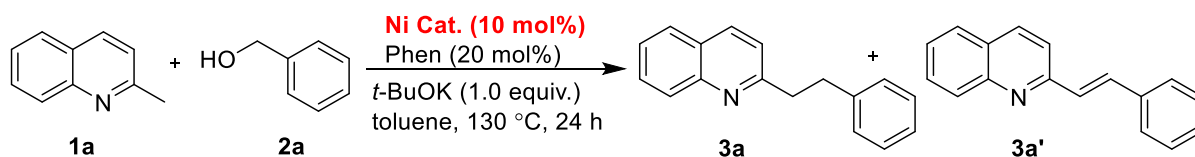

| Entry    | Ni-Catalyst             | GC-MS Conversion <b>3a</b> (%) | GC-MS Conversion <b>3a'</b> (%) |
|----------|-------------------------|--------------------------------|---------------------------------|
| 1        | NiCl <sub>2</sub>       | 53                             | 47                              |
| <b>2</b> | <b>NiBr<sub>2</sub></b> | <b>73 (70%)<sup>b</sup></b>    | <b>25</b>                       |
| 2        | Ni(acac) <sub>2</sub>   | 30                             | 34                              |
| 3        | NiCl <sub>2</sub> (DME) | 13                             | 48                              |
| 4        | Ni(COD) <sub>2</sub>    | 8                              | 22                              |
| 5        | No Catalyst             | 0                              | 0                               |

Reaction condition: [a] Quinaldine **1a** (0.25 mmol), Benzyl alcohol **2a** (0.50 mmol), **Ni Cat. (10 mol%)**, Phen (20 mol%), *t*-BuOK (0.25 mmol), Toluene (2.0 mL), Schlenk tube under nitrogen atmosphere, 130 °C oil bath, 24 h reaction time. [b] Isolated yield average of two run.

**Table S2:** Screening of ligands<sup>a</sup>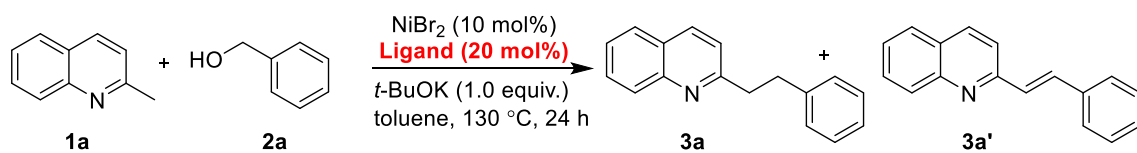

| Entry | <b>Ligand</b>                                                                                    | GC-MS Conversion <b>3a</b> (%) | GC-MS Conversion <b>3a'</b> (%) |
|-------|--------------------------------------------------------------------------------------------------|--------------------------------|---------------------------------|
| 1     | 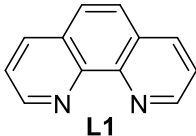<br><b>L1</b>   | <b>73 (70%)<sup>b</sup></b>    | <b>25</b>                       |
| 2     | <br><b>L2</b>   | 1                              | 9                               |
| 3     | <br><b>L3</b>  | 0                              | 12                              |
| 4     | <br><b>L4</b> | 2                              | 47                              |
| 5     | <br><b>L5</b> | 0                              | 10                              |
| 9     | No Ligand                                                                                        | 8                              | 22                              |

Reaction condition: [a] Quinaldine **1a** (0.25 mmol), Benzyl alcohol **2a** (0.50 mmol),  $\text{NiBr}_2$  (10 mol%), **Ligand** (20 mol%),  $t\text{-BuOK}$  (0.25 mmol), Toluene (2.0 mL), Schlenk tube under nitrogen atmosphere, 130 °C oil bath, 24 h reaction time. [b] Isolated yield average of two run.

**Table S3:** Screening of base<sup>a</sup>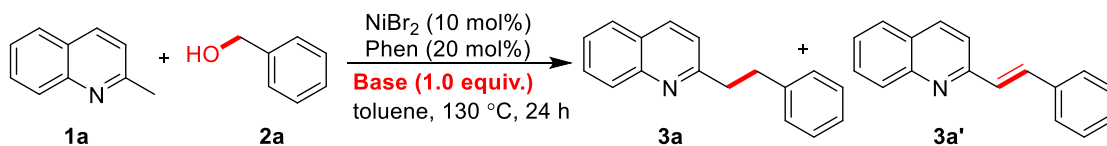

| Entry | <b>Base</b>          | GC-MS Conversion <b>3a</b> (%) | GC-MS Conversion <b>3a'</b> (%) |
|-------|----------------------|--------------------------------|---------------------------------|
| 1     | <b><i>t</i>-BuOK</b> | <b>73 (70%)<sup>b</sup></b>    | <b>25</b>                       |

|   |                                 |    |    |
|---|---------------------------------|----|----|
| 2 | <i>t</i> -BuONa                 | 14 | 39 |
| 3 | K <sub>3</sub> PO <sub>4</sub>  | 0  | 18 |
| 4 | Na <sub>2</sub> CO <sub>3</sub> | 2  | 12 |

*Reaction condition:* [a] Quinaldine **1a** (0.25 mmol), Benzyl alcohol **2a** (0.50 mmol), NiBr<sub>2</sub> (10 mol%), Phen (20 mol%), **Base (0.25 mmol)**, Toluene (2.0 mL), Schlenk tube under nitrogen atmosphere, 130 °C oil bath, 24 h reaction time. [b] Isolated yield average of two run.

**Table S4:** Screening of solvents <sup>a</sup>

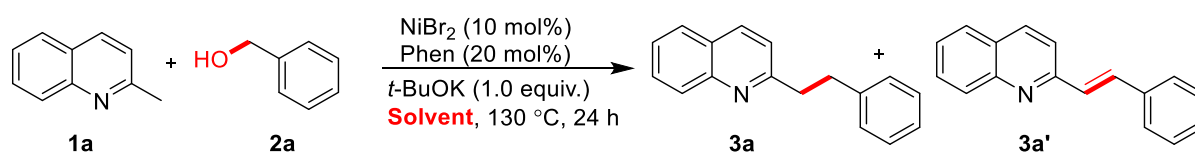

| Entry    | <b>Solvent</b>         | GC-MS Conversion <b>3a</b> (%) | GC-MS Conversion <b>3a'</b> (%) |
|----------|------------------------|--------------------------------|---------------------------------|
| <b>1</b> | <b>Toluene</b>         | <b>73 (70%)<sup>b</sup></b>    | <b>25</b>                       |
| 2        | <i>p</i> -Xylene       | 34                             | 40                              |
| 3        | 1,4-Dioxane            | 1                              | 5                               |
| 4        | DMA                    | 0                              | 0                               |
| 5        | <i>t</i> -Amyl alcohol | 0                              | 1                               |

*Reaction condition:* [a] Quinaldine **1a** (0.25 mmol), Benzyl alcohol **2a** (0.50 mmol), NiBr<sub>2</sub> (10 mol%), Phen (20 mol%), *t*-BuOK (0.25 mmol), **Solvent (2.0 mL)**, Schlenk tube under nitrogen atmosphere, 130 °C oil bath, 24 h reaction time. [b] Isolated yield average of two run.

**Table S5:** Screening of base equivalents<sup>a</sup>

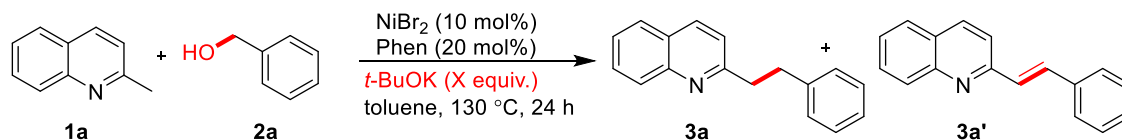

| Entry    | <b>Base Equivalent<br/>(X equiv.)</b> | GC-MS Conversion <b>3a</b> (%) | GC-MS Conversion <b>3a'</b> (%) |
|----------|---------------------------------------|--------------------------------|---------------------------------|
| <b>1</b> | <b><i>t</i>-BuOK (1.0 equiv.)</b>     | <b>73 (70%)<sup>b</sup></b>    | <b>25</b>                       |
| 2        | <i>t</i> -BuOK (0.75 equiv.)          | 12                             | 35                              |

|   |                              |   |    |
|---|------------------------------|---|----|
| 3 | <i>t</i> -BuOK (0.50 equiv.) | 9 | 29 |
| 4 | <i>t</i> -BuOK (0.25 equiv.) | 0 | 1  |
| 5 | -                            | 0 | 0  |

*Reaction condition:* [a] Quinaldine **1a** (0.25 mmol), Benzyl alcohol **2a** (0.50 mmol), NiBr<sub>2</sub> (10 mol%), Phen (20 mol%), *t*-BuOK (**X equiv.**), Toluene (2.0 mL), Schlenk tube under nitrogen atmosphere, 130 °C oil bath, 24 h reaction time. [b] Isolated yield average of two run.

**Table S6:** Screening of Catalyst and Ligand Loading <sup>a</sup>

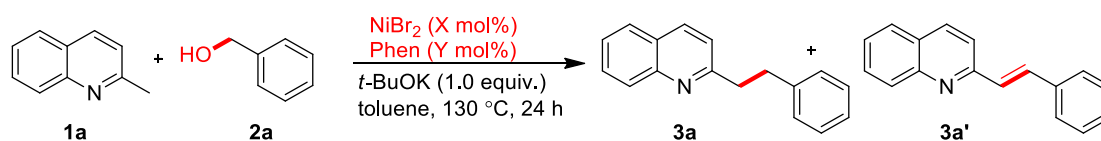

| Entry                | Cat. (X mol%)                     | Ligand (Y mol%)       | GC-MS Conversion <b>3a</b> (%) | GC-MS Conversion <b>3a'</b> (%) |
|----------------------|-----------------------------------|-----------------------|--------------------------------|---------------------------------|
| <b>1</b>             | <b>NiBr<sub>2</sub> (10 mol%)</b> | <b>Phen (20 mol%)</b> | <b>73 (70%)<sup>b</sup></b>    | <b>25</b>                       |
| 2                    | NiBr <sub>2</sub> (10 mol%)       | Phen (30 mol%)        | 27                             | 58                              |
| 3                    | NiBr <sub>2</sub> (10 mol%)       | Phen (40 mol%)        | 65                             | 34                              |
| <b>4</b>             | <b>NiBr<sub>2</sub> (10 mol%)</b> | <b>Phen (50 mol%)</b> | <b>100 (96%)<sup>b</sup></b>   | <b>0</b>                        |
| <b>5<sup>c</sup></b> | <b>NiBr<sub>2</sub> (10 mol%)</b> | <b>Phen (50 mol%)</b> | <b>100 (97%)<sup>b</sup></b>   | <b>0</b>                        |
| 6                    | NiBr <sub>2</sub> (5.0 mol%)      | Phen (25 mol%)        | 13                             | 18                              |
| 7                    | NiBr <sub>2</sub> (2.5 mol%)      | Phen (12.5 mol%)      | 8                              | 36                              |
| 8                    | -                                 | -                     | 0                              | 0                               |

*Reaction condition:* [a] Quinaldine **1a** (0.25 mmol), Benzyl alcohol **2a** (0.50 mmol), NiBr<sub>2</sub> (**X mol%**), Phen (**Y mol%**), *t*-BuOK (0.25 mmol), Toluene (2.0 mL), Schlenk tube under nitrogen atmosphere, 130 °C oil bath, 24 h reaction time. [b] Isolated yield average of two run. [c] 140 °C, 24 h.

## Deuterium incorporation studies:

Scheme S1:

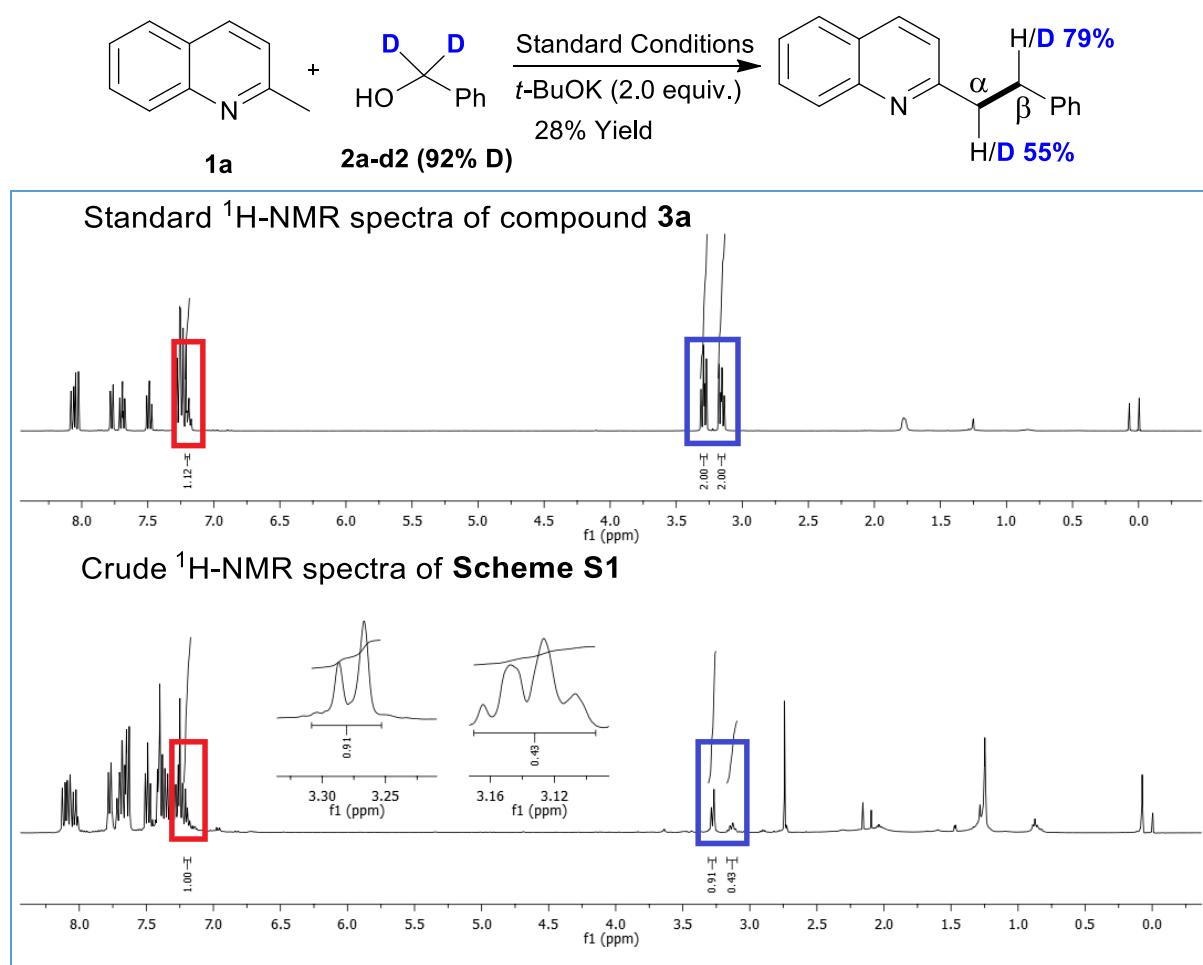

Conversion was calculated by  $^1\text{H}$ -NMR integration value

|                             |           | Deuterium<br>incorporation in<br>$\alpha$ position | Deuterium<br>incorporation in<br>$\beta$ position |
|-----------------------------|-----------|----------------------------------------------------|---------------------------------------------------|
| Signal $\delta$ ppm         | 7.21 (1H) | 3.29 (2H)                                          | 3.15 (2H)                                         |
| Integral Value              | 1.0       | 0.91                                               | 0.43                                              |
| <b>Calculated<br/>ratio</b> |           | $\{(2-0.91)/2\} \times 100 =$<br><b>55%</b>        | $\{(2-0.43)/2\} \times 100 =$<br><b>79%</b>       |

**Scheme S2:**

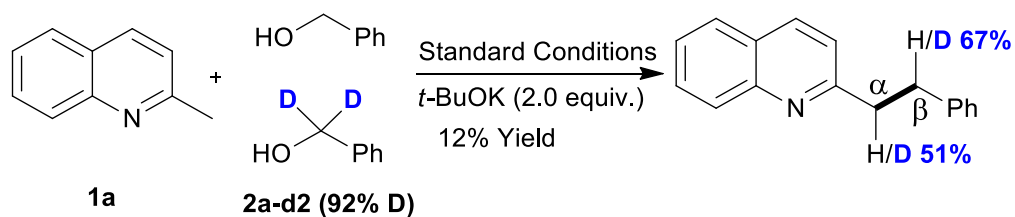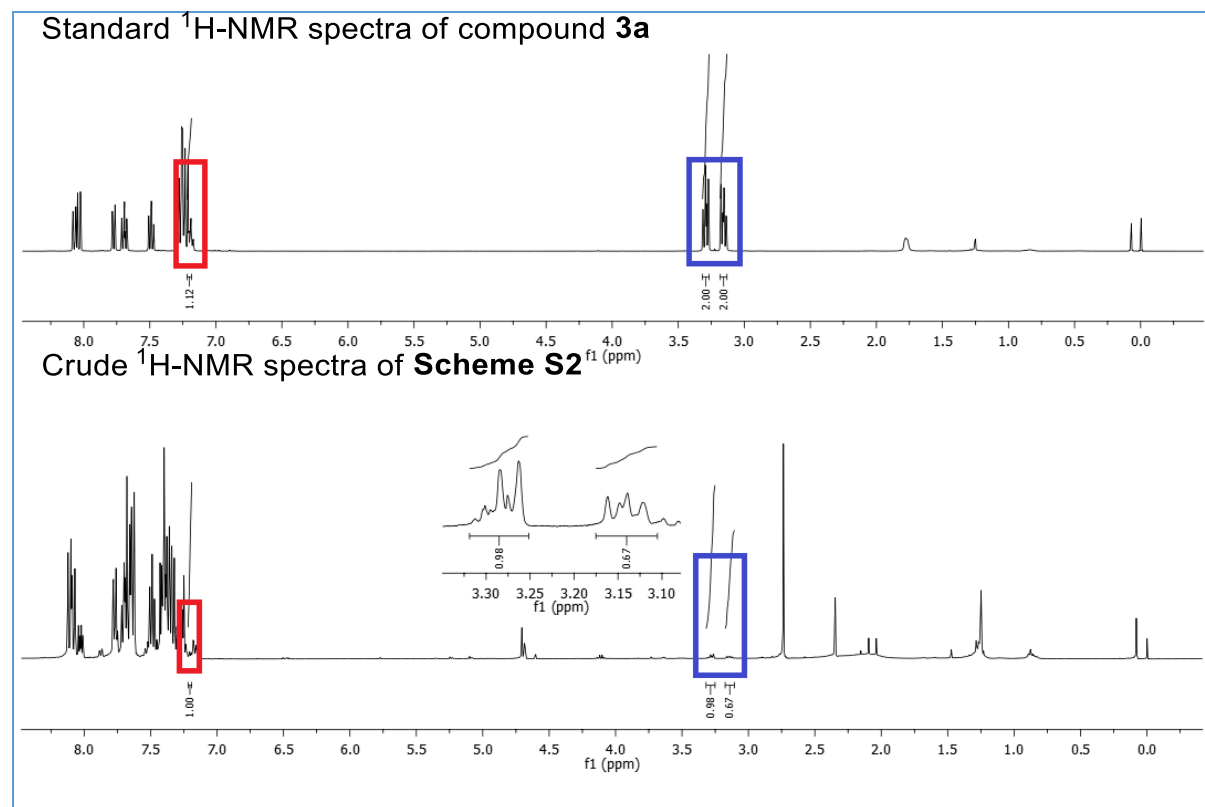

Conversion was calculated by  $^1\text{H-NMR}$  integration value

|                             |           | Deuterium<br>incorporation in<br>$\alpha$ position | Deuterium<br>incorporation in<br>$\beta$ position |
|-----------------------------|-----------|----------------------------------------------------|---------------------------------------------------|
| Signal $\delta$ ppm         | 7.21 (1H) | 3.29 (2H)                                          | 3.15 (2H)                                         |
| Integral Value              | 1.0       | 0.98                                               | 0.67                                              |
| <b>Calculated<br/>ratio</b> |           | $\{(2-0.98)/2\} \times 100 =$<br><b>51%</b>        | $\{(2-0.67)/2\} \times 100 =$<br><b>67%</b>       |



**Scheme S3:**

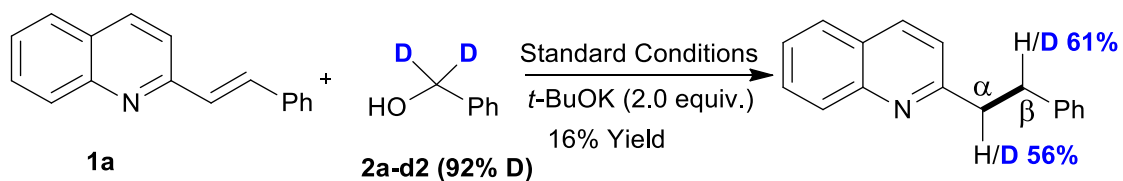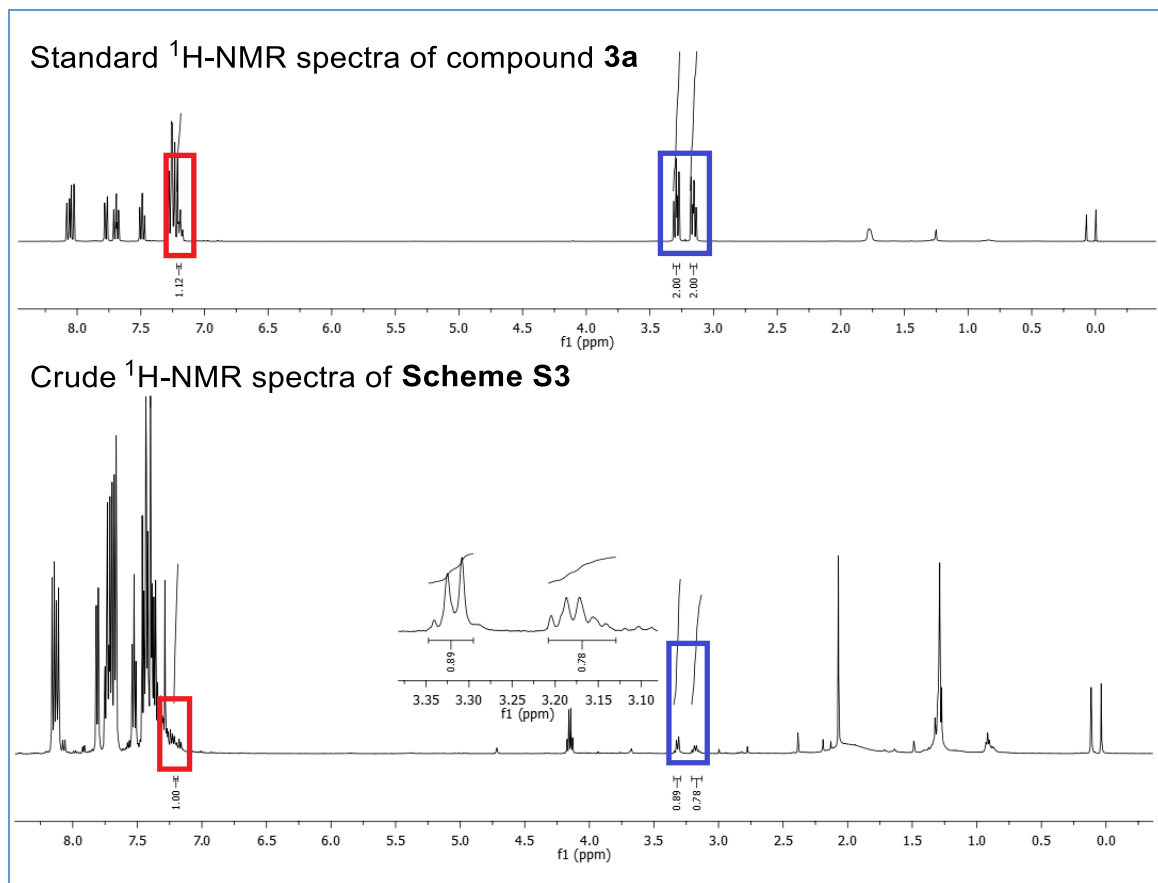

Conversion was calculated by  $^1\text{H}$ -NMR integration value

|                     |           | Deuterium<br>incorporation in<br>$\alpha$ position | Deuterium<br>incorporation in<br>$\beta$ position |
|---------------------|-----------|----------------------------------------------------|---------------------------------------------------|
| Signal $\delta$ ppm | 7.21 (1H) | 3.29 (2H)                                          | 3.15 (2H)                                         |
| Integral Value      | 1.0       | 0.89                                               | 0.78                                              |

|                         |  |                                             |                                             |
|-------------------------|--|---------------------------------------------|---------------------------------------------|
| <b>Calculated ratio</b> |  | $\{(2-0.89)/2\} \times 100 =$<br><b>56%</b> | $\{(2-0.78)/2\} \times 100 =$<br><b>61%</b> |
|-------------------------|--|---------------------------------------------|---------------------------------------------|

#### Scheme S4:

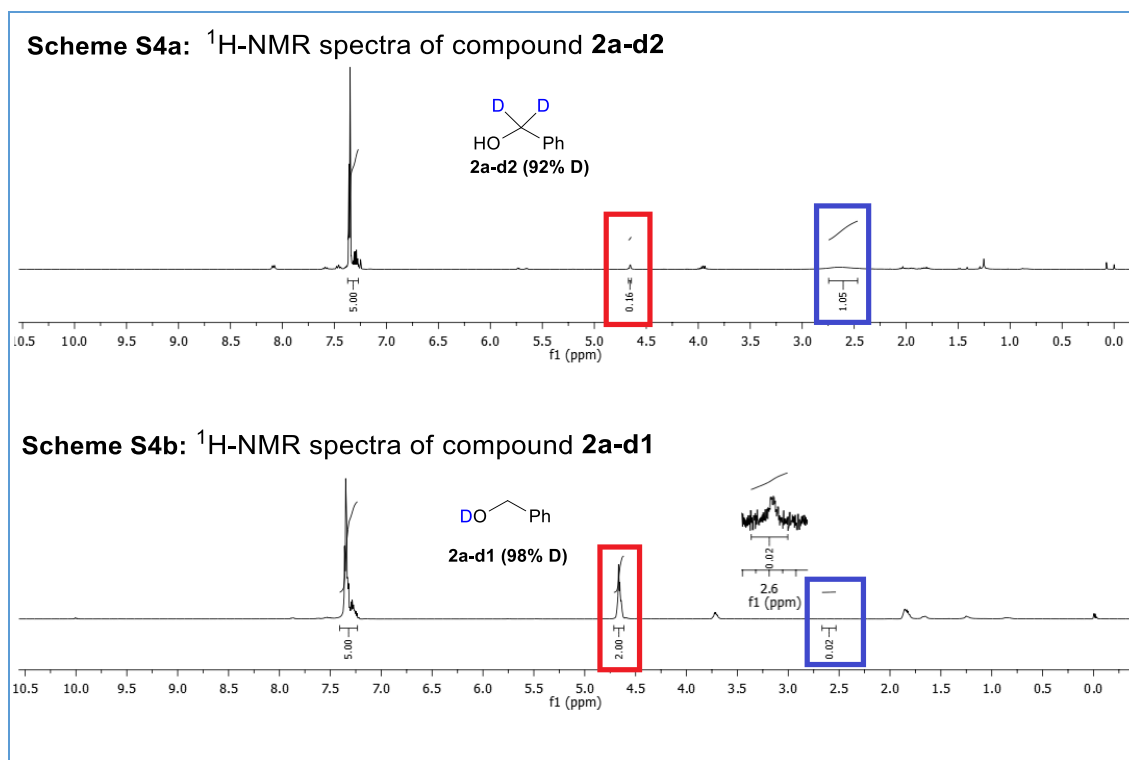

Conversion was calculated by  $^1\text{H}$ -NMR integration value

|                                |                | Deuterium incorporation in <b>CH<sub>2</sub></b> position | Deuterium incorporation in <b>OH</b> position |
|--------------------------------|----------------|-----------------------------------------------------------|-----------------------------------------------|
| Signal $\delta$ ppm (Standard) | 7.24-7.36 (5H) | 4.65 (2H)                                                 | 2.65 (1H)                                     |
| Integral Value (Scheme S4a)    | 5.0            | 0.16                                                      | 1.05                                          |
| <b>Calculated ratio</b>        |                | $\{(2-0.16)/2\} \times 100 =$ <b>92%</b>                  | $\{(1-1)\} \times 100 =$ <b>0%</b>            |
| Integral Value (Scheme S4b)    | 5.0            | 2.0                                                       | 0.02                                          |
| <b>Calculated ratio</b>        |                | $\{(2.0-2.0)/2\} \times 100 =$ <b>0%</b>                  | $\{(1-0.02)\} \times 100 =$ <b>98%</b>        |

### Scheme S5: Studies for the progress of the reaction over time

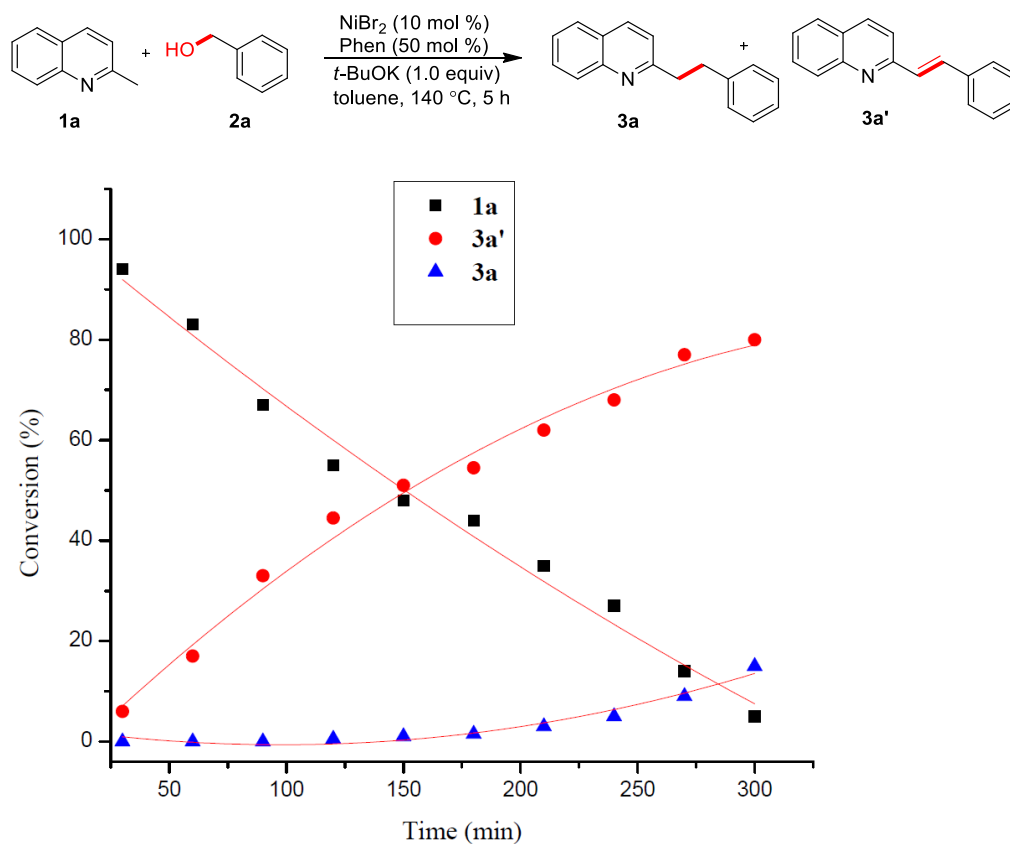

Graphical representation for GC Conversion of **1a**, **3a** and **3a'** vs time

### Scheme S6: Determination of rate and order of reaction

Run 1: Reaction was carried out in 2 mL of toluene and yield was calculated by GC

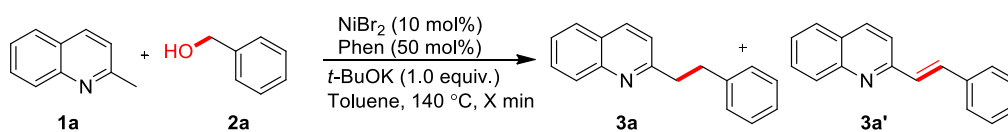

| No.   | <b>1a</b><br>(mmol) | <b>2a</b><br>(mmol) | $\text{NiBr}_2$<br>(mmol) | Phen<br>(mmol) | $t\text{-BuOK}$<br>(mmol) | Toluene<br>(mL) |
|-------|---------------------|---------------------|---------------------------|----------------|---------------------------|-----------------|
| Run 1 | 0.2                 | 0.4                 | 0.02                      | 0.1            | 0.2                       | 2.0             |

| Sl. No. | Time (min) | Concentration of <b>1a</b> (mM) |
|---------|------------|---------------------------------|
| 1       | 30         | 95                              |
| 2       | 60         | 77                              |
| 3       | 90         | 64                              |
| 4       | 120        | 59                              |
| 5       | 150        | 53                              |
| 6       | 180        | 47                              |
| 7       | 210        | 42                              |
| 8       | 240        | 39                              |

Run 2: Reaction was carried out in 2 mL of toluene and yield was calculated by GC

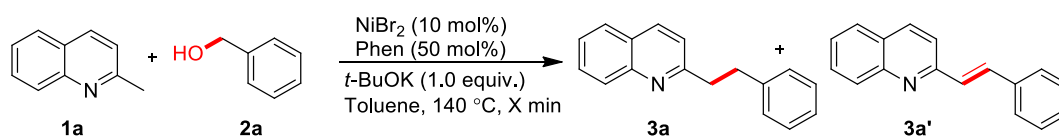

| No.   | <b>1a</b><br>(mmol) | <b>2a</b><br>(mmol) | $\text{NiBr}_2$<br>(mmol) | Phen<br>(mmol) | $t\text{-BuOK}$<br>(mmol) | Toluene<br>(mL) |
|-------|---------------------|---------------------|---------------------------|----------------|---------------------------|-----------------|
| Run 2 | 0.25                | 0.5                 | 0.025                     | 0.125          | 0.25                      | 2.0             |

| Sl. No. | Time (min) | Concentration of <b>1a</b> (mM) |
|---------|------------|---------------------------------|
| 1       | 30         | 107                             |
| 2       | 60         | 95                              |
| 3       | 90         | 84                              |
| 4       | 120        | 73                              |
| 5       | 150        | 62                              |
| 6       | 180        | 52                              |
| 7       | 210        | 48                              |
| 8       | 240        | 42                              |

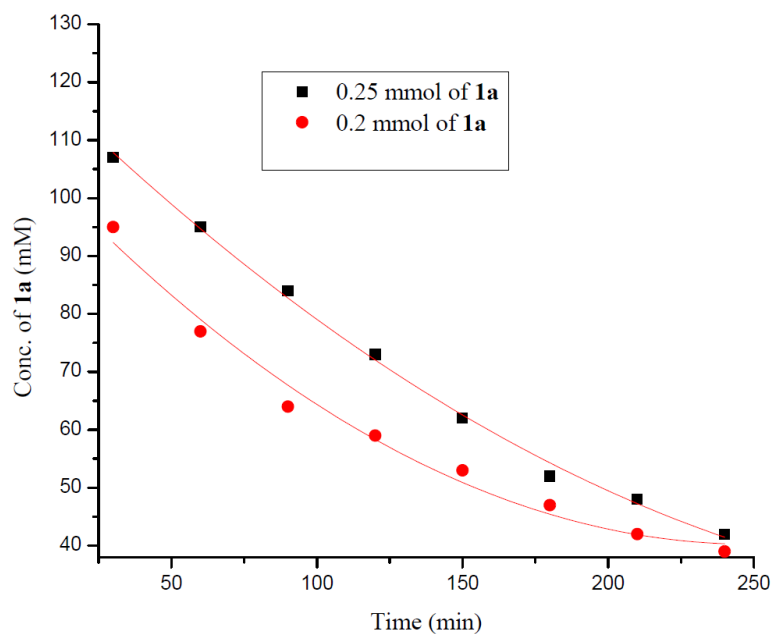

Graphical representation for determination of rate and order of reaction

Considering steady state approximation for benzyl alcohol

$$\text{From Run 1: Slope} = k [1a]^x$$

$$- 0.248 = k [0.2]^x$$

$$\text{From Run 2: Slope} = k [1a]^x$$

$$- 0.316 = k [0.25]^x$$

$$- 0.316 / - 0.248 = [0.25]^x / [0.2]^x$$

$$1.27 = [1.25]^x$$

$$\text{Log} (1.27) = x. \text{Log} (1.25)$$

$$x = 0.103 / 0.097$$

$$= 1.06 \approx 1$$

$$\text{Rate} = k [1a]^1$$

## Scheme S7:

### (i) Metal hydride trapping studies using *in situ* $^1\text{H}$ NMR:

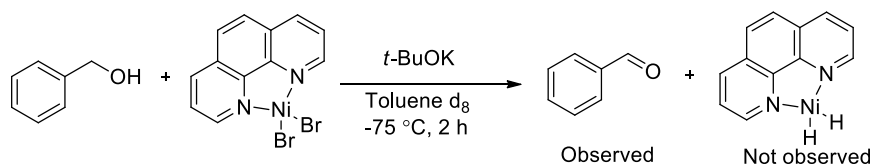

**Reaction condition:** [a] Benzyl alcohol (0.2 mmol),  $\text{NiBr}_2\cdot\text{Phen}$  complex (0.02 mmol),  $t\text{-BuOK}$  (0.2 mmol), toluene  $\text{d}_8$  (0.4 mL), in NMR tube under nitrogen atmosphere,  $^1\text{H}$  NMR was recorded at  $-75\text{ }^\circ\text{C}$ .

The reaction mixture was turned reddish brown colour indicating the formation of metal hydride species, several attempt made to trace metal hydride by  $^1\text{H}$ -NMR experiments and it was not successful. We observed the benzaldehyde formation. These results indicating that the nickel-hydride species is not stable under this conditions.

**Characterization of  $\text{NiBr}_2\cdot\text{Phen}$  complex:** Chemical Formula:  $\text{C}_{12}\text{H}_8\text{Br}_2\text{N}_2\text{Ni}$ ; Elemental Analysis calculated (%): C, 36.15; H, 2.02; Br, 40.08; N, 7.03; Ni, 14.72; Found (%): C, 35.57; H, 2.66; N, 6.91 (Ref: M. Khrizanforov, K.Vera, V. Mamedov, N. Zhukova, S. Strekalova, V. Grinenko, T. Gryaznova, O. Sinyashin, Y. Budnikova, J. Organomet. Chem. 2016, **820**, 82).

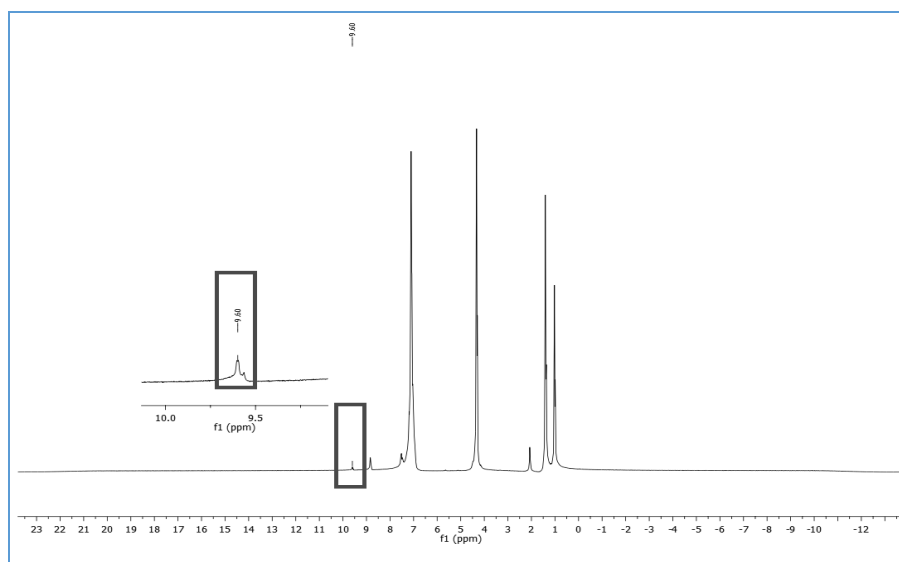

$^1\text{H}$  NMR spectra at  $(-75\text{ }^\circ\text{C})$  in toluene  $\text{d}_8$

**(ii): Experimental evidences for generation of Ni-H species:**

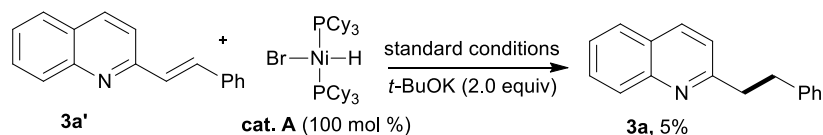

**Preparation of cat. A:** The catalyst was prepared following literature reported procedure. The Ni-H species, **cat. A** was obtained as pale yellow solid and the solid decomposes very fast in solvent. Characterization data are in agreement with the literature reported data.

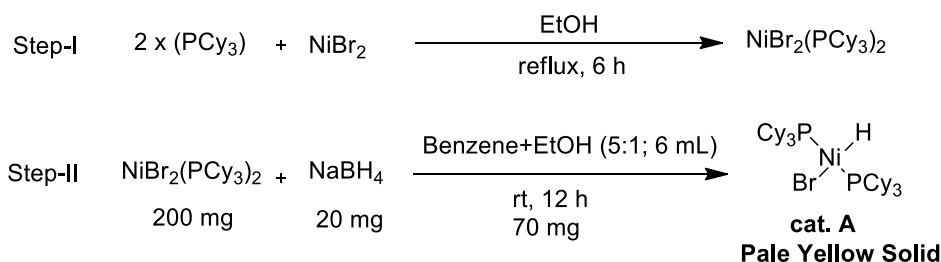

*Characterization of cat. A:* IR: Ni-H  $1950 \text{ cm}^{-1}$ ; M.P: (150-151) °C (decompose).

Ref: 1. M. L. H. Green, T. Saito, P. J. Tanfield, *J. Chem. Soc. A* **1971**, 152-154.

2. M. M. Lindner, U. Beckmann, W. Frank, W. Kläui, *ISRN Inorg. Chem.* **2013**, 1-13.

**[1.4] Spectroscopic and analytical data:**

**2-phenethylquinoline (3a)<sup>1</sup>:** Following the general procedure A the title compound was

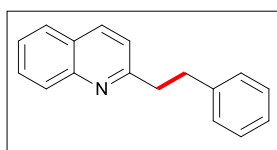

isolated as light brown oil (Yield 97%).  $^1\text{H}$  NMR (400 MHz,  $\text{CDCl}_3$ )  $\delta$  8.08 – 8.02 (m, 2H), 7.77 (d,  $J = 8.1 \text{ Hz}$ , 1H), 7.69 (ddt,  $J = 8.4$ , 6.9, 1.5 Hz, 1H), 7.51 – 7.47 (m, 1H), 7.30 – 7.17 (m, 6H), 3.32 – 3.27 (m, 2H), 3.18 – 3.14 (m, 2H);  $^{13}\text{C}$  NMR (100 MHz,  $\text{CDCl}_3$ )  $\delta$  161.91, 148.08, 141.61, 136.30, 129.49, 128.96, 128.61, 128.48, 127.61, 126.90, 126.08, 125.88, 121.65, 41.07, 36.02.

**2-(4-ethylphenethyl)quinoline (3b):** Following the general procedure A the title compound

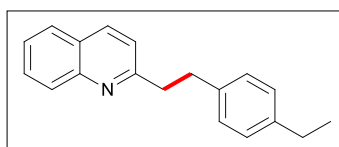

was isolated as light brown oil (Yield 95%).  $^1\text{H}$  NMR (400 MHz,  $\text{CDCl}_3$ )  $\delta$  8.06 (dd,  $J = 13.6$ , 8.5 Hz, 2H), 7.78 (dd,  $J = 8.1$ , 1.1 Hz, 1H), 7.70 (ddd,  $J = 8.4$ , 6.9, 1.4 Hz, 1H), 7.49 (ddd,  $J = 8.0$ ,

6.9, 1.1 Hz, 1H), 7.25 (d,  $J = 8.4$  Hz, 1H), 7.18 (d,  $J = 8.0$  Hz, 2H), 7.12 (d,  $J = 7.9$  Hz, 2H), 3.30 – 3.26 (m, 2H), 3.14 – 3.10 (m, 2H), 2.62 (q,  $J = 7.6$  Hz, 2H), 1.23 (t,  $J = 7.6$  Hz, 3H);  $^{13}\text{C}$  NMR (100 MHz,  $\text{CDCl}_3$ )  $\delta$  162.08, 148.06, 141.98, 138.80, 136.33, 129.49, 128.95, 128.53, 127.98, 127.62, 126.90, 125.87, 121.67, 41.22, 35.67, 28.55, 15.74. Elemental Analysis: Calculated C, 87.31; H, 7.33; N, 5.36; Found C, 86.42; H, 7.27; N, 4.08.

**2-(4-isopropylphenethyl)quinoline (3c):** Following the general procedure A the title

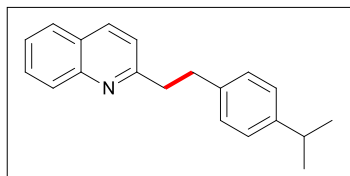

compound was isolated as light brown oil (Yield 78%).  $^1\text{H}$  NMR (400 MHz,  $\text{CDCl}_3$ )  $\delta$  8.07 (dd,  $J = 15.3, 8.4$  Hz, 2H), 7.78 (dd,  $J = 8.1, 1.1$  Hz, 1H), 7.70 (ddd,  $J = 8.4, 6.9, 1.5$  Hz, 1H), 7.49 (ddd,  $J = 8.1, 7.0, 1.1$  Hz, 1H), 7.26 (d,  $J = 8.4$  Hz,

1H), 7.21 – 7.19 (m, 2H), 7.17 – 7.15 (m, 2H), 3.31 – 3.27 (m, 2H), 3.15 – 3.11 (m, 2H), 2.93 – 2.85 (m, 1H), 1.25 (d,  $J = 6.9$  Hz, 6H);  $^{13}\text{C}$  NMR (100 MHz,  $\text{CDCl}_3$ )  $\delta$  162.11, 148.08, 146.63, 138.95, 136.33, 129.49, 128.97, 128.50, 127.63, 126.90, 126.55, 125.87, 121.66, 41.20, 35.66, 33.80, 24.17; Elemental Analysis: Calculated C, 87.23; H, 7.69; N, 5.09; Found C, 88.02; H, 7.19; N, 4.38.

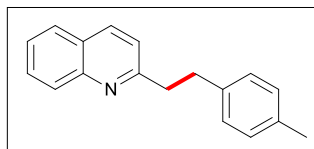

**2-(4-methylphenethyl)quinoline (3d)<sup>1</sup>:** Following the general procedure A the title compound was isolated as light brown oil (Yield 95%).  $^1\text{H}$  NMR (400 MHz,  $\text{CDCl}_3$ )  $\delta$  8.06 (dd,  $J = 12.3, 8.5$

Hz, 2H), 7.77 (dd,  $J = 8.1, 1.1$  Hz, 1H), 7.69 (ddd,  $J = 8.4, 6.9, 1.4$  Hz, 1H), 7.49 (ddd,  $J = 8.0, 7.0, 1.1$  Hz, 1H), 7.25 – 7.22 (m, 1H), 7.15 (d,  $J = 8.0$  Hz, 2H), 7.09 (d,  $J = 8.1$  Hz, 2H), 3.29 – 3.25 (m, 2H), 3.13 – 3.09 (m, 2H), 2.31 (s, 3H);  $^{13}\text{C}$  NMR (100 MHz,  $\text{CDCl}_3$ )  $\delta$  162.05, 148.06, 138.52, 136.34, 135.54, 129.49, 129.18, 128.94, 128.48, 128.02, 127.62, 126.89, 121.68, 41.22, 35.63, 21.13.

**2-(2-methylphenethyl)quinoline (3e)<sup>1</sup>:** Following the general procedure A the title

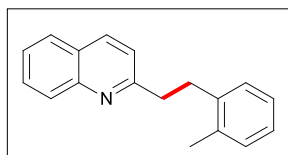

compound was isolated as light brown oil (Yield 94%).  $^1\text{H}$  NMR (400 MHz,  $\text{CDCl}_3$ )  $\delta$  8.06 (dd,  $J = 13.9, 8.5$  Hz, 2H), 7.78 (d,  $J = 8.1$  Hz, 1H), 7.72 – 7.68 (m, 1H), 7.50 (ddd,  $J = 8.0, 7.0, 1.1$  Hz, 1H), 7.25 – 7.10 (m, 5H), 3.27 – 3.23 (m, 2H), 3.15 – 3.11 (m, 2H), 2.34

(s, 3H);  $^{13}\text{C}$  NMR (100 MHz,  $\text{CDCl}_3$ )  $\delta$  162.08, 148.09, 139.77, 136.32, 136.12, 130.29, 129.50, 128.98, 128.95, 127.62, 126.89, 126.24, 126.12, 125.90, 121.61, 39.78, 33.35, 19.46.



**2-(4-methoxyphenethyl)quinolone (3f)<sup>1</sup>:** Following the general procedure A the title

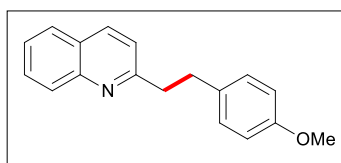

compound was isolated as light brown oil (Yield 96%). <sup>1</sup>H NMR (400 MHz, CDCl<sub>3</sub>)  $\delta$  8.07 – 8.02 (m, 2H), 7.77 (d,  $J$  = 8.1 Hz, 1H), 7.69 (ddt,  $J$  = 8.2, 6.9, 1.3 Hz, 1H), 7.48 (ddt,  $J$  = 8.1, 7.0, 1.2 Hz, 1H), 7.22 (dd,  $J$  = 8.4, 1.0 Hz, 1H), 7.14 (d,  $J$  = 8.3 Hz, 2H), 6.81 (dd,  $J$  = 8.7, 0.7 Hz, 2H), 3.77 (s, 3H), 3.27 – 3.23 (m, 2H), 3.10 – 3.06 (m, 2H); <sup>13</sup>C NMR (100 MHz, CDCl<sub>3</sub>)  $\delta$  162.03, 157.94, 148.04, 136.30, 133.65, 129.52, 129.48, 128.91, 127.63, 126.87, 125.85, 121.72, 113.86, 55.33, 41.38, 31.05.

**2-(1-(naphthalen-2-yl)ethyl)quinolone (3g)<sup>2</sup>:** Following the general procedure A the title

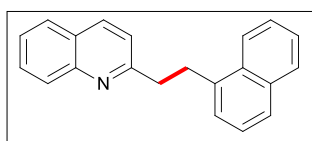

compound was isolated as light brown oil (Yield 84%). <sup>1</sup>H NMR (400 MHz, CDCl<sub>3</sub>)  $\delta$  8.18 (d,  $J$  = 8.4 Hz, 1H), 8.11 (d,  $J$  = 8.4 Hz, 1H), 8.06 – 8.02 (m, 1H), 7.89 – 7.85 (m, 1H), 7.79 (d,  $J$  = 7.5 Hz, 1H), 7.75 – 7.69 (m, 2H), 7.55-7.52 (m, 3H), 7.39 – 7.32 (m, 2H), 7.19 (dd,  $J$  = 12.8, 10.3 Hz, 1H), 3.64 – 3.60 (m, 2H), 3.44 – 3.40 (m, 2H); <sup>13</sup>C NMR (100 MHz, CDCl<sub>3</sub>)  $\delta$  162.05, 148.08, 137.61, 136.39, 135.19, 133.36, 131.88, 129.57, 128.92, 127.67, 126.94, 126.24, 126.04, 125.95, 125.68, 125.62, 124.90, 123.85, 121.74, 40.16, 33.16.

**2-nonylquinoline (3h)<sup>1</sup>:** Following the general procedure A the title compound was isolated

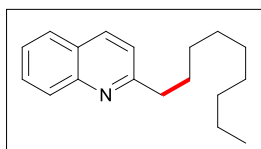

as pale yellow oil (Yield 60%). <sup>1</sup>H NMR (400 MHz, CDCl<sub>3</sub>)  $\delta$  8.66 (dd,  $J$  = 4.2, 1.7 Hz, 1H), 8.00 – 7.97 (m, 1H), 7.27 – 7.25 (m, 2H), 7.14 (d,  $J$  = 8.2 Hz, 1H), 6.96 (d,  $J$  = 8.2 Hz, 1H), 2.90 (t,  $J$  = 6.4 Hz, 2H), 1.44-1.40 (m, 2H), 1.30-1.25 (m, 12H), 0.85 (t,  $J$  = 8 Hz, 3H); GC-MS (EI)  $m/z$  = 255.1.

**2-undecylquinoline (3i)<sup>3</sup>:** Following the general procedure A the title compound was

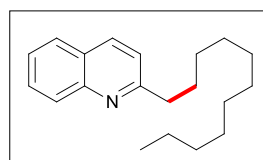

isolated as pale yellow oil (Yield 48%). <sup>1</sup>H NMR (400 MHz, CDCl<sub>3</sub>)  $\delta$  8.66 (dd,  $J$  = 4.2, 1.7 Hz, 1H), 7.99 (dd,  $J$  = 8.3, 1.7 Hz, 1H), 7.29 – 7.25 (m, 2H), 7.14 (d,  $J$  = 8.2 Hz, 1H), 6.96 (d,  $J$  = 8.2 Hz, 1H), 2.90 (t,  $J$  = 6.4 Hz, 2H), 1.46-1.40 (m, 2H), 1.32-1.25 (m, 16H), 0.85 (t,  $J$  = 8 Hz, 3H); <sup>13</sup>C NMR (100 MHz, CDCl<sub>3</sub>)  $\delta$  161.30, 147.04, 140.75, 135.99, 130.72, 129.15, 127.44, 120.63, 113.19, 40.60, 31.99, 30.99, 30.16, 26.97, 22.77, 14.22.

**2-Tridecylquinoline (3j)**<sup>1</sup>: Following the general procedure A the title compound was

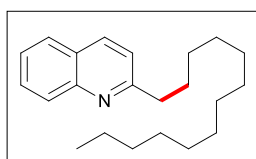

isolated as pale yellow oil (Yield 38%). <sup>1</sup>H NMR (400 MHz, CDCl<sub>3</sub>)  $\delta$  8.66 (dd,  $J$  = 4.2, 1.7 Hz, 1H), 7.99 (dd,  $J$  = 8.3, 1.7 Hz, 1H), 7.30 – 7.25 (m, 2H), 7.14 (d,  $J$  = 8.2 Hz, 1H), 6.96 (d,  $J$  = 8.2 Hz, 1H), 2.91 (t,  $J$  = 6.4 Hz, 2H), 1.46 – 1.41 (m, 2H), 1.27–1.24 (m, 20H), 0.85 (t,  $J$  = 8 Hz, 3H); <sup>13</sup>C NMR (100 MHz, CDCl<sub>3</sub>)  $\delta$  160.80, 147.02, 140.74, 136.00, 130.88, 129.16, 127.44, 120.63, 113.18, 40.60, 32.02, 30.99, 30.17, 29.75, 29.46, 26.97, 22.79, 14.23.

**2-(4,8-dimethylnon-7-en-1-yl)quinoline (3k)**: Following the general procedure A the title

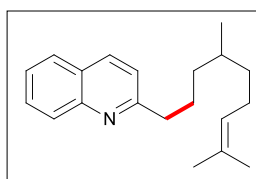

compound was isolated as pale yellow oil (Yield 47%). <sup>1</sup>H NMR (400 MHz, CDCl<sub>3</sub>)  $\delta$  8.70 (dd,  $J$  = 4.1, 1.4 Hz, 1H), 8.03 (dd,  $J$  = 8.2, 1.4 Hz, 1H), 7.33 – 7.29 (m, 2H), 7.18 (d,  $J$  = 8.2 Hz, 1H), 7.00 (d,  $J$  = 8.2 Hz, 1H), 5.95 (t,  $J$  = 6.8 Hz, 1H), 3.57 – 3.54 (m, 2H), 2.95 (t,  $J$  = 6.3 Hz, 2H), 2.20 (s, 3H), 2.09 (dd,  $J$  = 11.6, 6.0 Hz, 2H), 1.71 – 1.61 (m, 5H), 1.28 (s, 3H), 0.90 (dd,  $J$  = 11.6, 5.3 Hz, 3H); <sup>13</sup>C NMR (100 MHz, CDCl<sub>3</sub>)  $\delta$  146.94, 140.70, 137.53, 135.85, 129.05, 127.38, 121.24, 120.52, 116.57, 113.10, 41.28, 31.92, 30.88, 29.69, 29.35, 27.04, 22.68, 21.84, 14.09. Elemental Analysis: Calculated C, 85.35; H, 9.67; N, 4.98; Found C, 84.16; H, 9.91; N, 5.19.

**6-methoxy-2-phenethylquinoline (3l)**<sup>2</sup>: Following the general procedure B the title

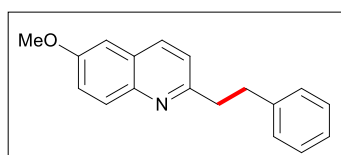

compound was isolated as light brown oil (Yield 62%). <sup>1</sup>H NMR (400 MHz, CDCl<sub>3</sub>)  $\delta$  7.95 (t,  $J$  = 9.0 Hz, 2H), 7.34 (dd,  $J$  = 9.1, 2.9 Hz, 1H), 7.29 – 7.16 (m, 6H), 7.04 (d,  $J$  = 2.8 Hz, 1H), 3.91 (s, 3H), 3.26 – 3.22 (m, 2H), 3.14 – 3.10 (m, 2H); <sup>13</sup>C NMR (100 MHz, CDCl<sub>3</sub>)  $\delta$  157.64, 155.68, 142.44, 140.03, 133.41, 128.66, 126.90, 126.75, 126.05, 124.32, 120.27, 120.16, 103.64, 53.89, 39.07, 34.40.

**8-methoxy-2-phenethylquinoline (3m)**<sup>4</sup>: Following the general procedure B the title

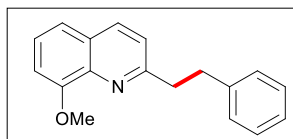

compound was isolated as light brown oil (Yield 92%). <sup>1</sup>H NMR (400 MHz, CDCl<sub>3</sub>)  $\delta$  8.01 (d,  $J$  = 8.4 Hz, 1H), 7.44 – 7.38 (m, 1H), 7.35 (dd,  $J$  = 8.1, 0.9 Hz, 1H), 7.33 – 7.23 (m, 5H), 7.19 (ddd,  $J$  = 8.5, 5.1, 2.0 Hz, 1H), 7.04 (d,  $J$  = 7.5 Hz, 1H), 4.08 (s, 3H), 3.38 – 3.34 (m, 2H), 3.17 – 3.13 (m, 2H); <sup>13</sup>C NMR (100 MHz, CDCl<sub>3</sub>)  $\delta$  157.65, 151.79, 138.32, 136.57, 132.86, 125.22, 125.08, 124.67, 122.65, 118.66, 116.20, 111.69, 104.54, 52.84, 37.68, 32.76.

**8-(allyloxy)-2-phenethylquinoline (3n):** Following the general procedure B the title

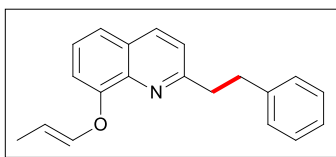

compound was isolated as pale yellow oil (Yield 60%).  $^1\text{H}$  NMR (400 MHz,  $\text{CDCl}_3$ )  $\delta$  8.01 (d,  $J$  = 8.5 Hz, 1H), 7.45 – 7.34 (m, 3H), 7.28 – 7.25 (m, 2H), 7.22 – 7.10 (m, 2H), 7.09 – 7.04 (m, 2H), 6.57 – 6.54 (m, 1H), 5.11 – 5.04 (m, 1H), 3.38 – 3.34 (m, 2H), 3.20 – 3.17 (m, 2H), 1.87 – 1.83 (m, 3H);  $^{13}\text{C}$  NMR (100 MHz,  $\text{CDCl}_3$ )  $\delta$  161.30, 153.13, 141.83, 141.44, 139.84, 136.16, 129.49, 128.70, 128.45, 128.16, 126.01, 121.40, 112.72, 111.30, 109.68, 40.88, 35.70, 9.94; Elemental Analysis: Calculated C, 83.01; H, 6.62; N, 4.84; Found C, 82.36; H, 6.11; N, 4.08.

**1-phenethylisoquinoline (3o):**<sup>5</sup> Following the general procedure A the title compound was

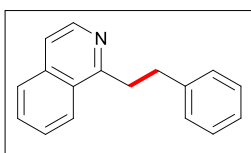

isolated as light brown oil (Yield 80%).  $^1\text{H}$  NMR (400 MHz,  $\text{CDCl}_3$ )  $\delta$  8.48 (d,  $J$  = 5.7 Hz, 1H), 8.15 (d,  $J$  = 8.5 Hz, 1H), 7.82 (d,  $J$  = 8.2 Hz, 1H), 7.66 (ddd,  $J$  = 8.2, 6.9, 1.1 Hz, 1H), 7.58 (ddd,  $J$  = 8.2, 6.9, 1.3 Hz, 1H), 7.53 (d,  $J$  = 5.7 Hz, 1H), 7.32 (d,  $J$  = 4.3 Hz, 4H), 7.25 – 7.20 (m, 1H), 3.63 – 3.58 (m, 2H), 3.23 – 3.18 (m, 2H);  $^{13}\text{C}$  NMR (100 MHz,  $\text{CDCl}_3$ )  $\delta$  158.95, 139.89, 134.18, 127.72, 126.40, 126.38, 125.35, 125.00, 124.88, 123.97, 122.98, 117.32, 35.13, 33.38.

**2-phenethylpyrazine (3p):**<sup>6</sup> Following the general procedure A the title compound was

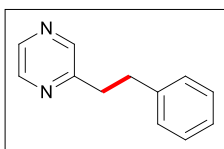

isolated as light brown oil (Yield 92%).  $^1\text{H}$  NMR (400 MHz,  $\text{CDCl}_3$ )  $\delta$  8.50 (dd,  $J$  = 2.5, 1.6 Hz, 1H), 8.38 (d,  $J$  = 2.6 Hz, 1H), 8.34 (d,  $J$  = 1.5 Hz, 1H), 7.29 – 7.23 (m, 2H), 7.21 – 7.14 (m, 3H), 3.14 – 3.03 (m, 4H);  $^{13}\text{C}$  NMR (100 MHz,  $\text{CDCl}_3$ )  $\delta$  156.83, 144.83, 144.75, 144.25, 144.16, 142.48, 142.39, 140.83, 128.54, 126.36, 37.32, 35.47.

**2-(4-ethylphenethyl)pyrazine (3q):**<sup>6</sup> Following the general procedure B the title compound

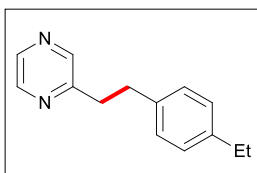

was isolated as light brown oil (Yield 71%).  $^1\text{H}$  NMR (400 MHz,  $\text{CDCl}_3$ )  $\delta$  8.57 (s, 1H), 8.42 (d,  $J$  = 15.6 Hz, 2H), 7.46 – 7.43 (m, 2H), 7.13 – 7.10 (m, 2H), 3.14 – 3.11 (m, 2H), 3.05 – 3.01 (m, 2H), 2.60 (q,  $J$  = 7.6 Hz, 2H), 1.21 (t,  $J$  = 7.6 Hz, 3H);  $^{13}\text{C}$  NMR (100 MHz,  $\text{CDCl}_3$ )  $\delta$  156.65, 144.81, 144.20, 142.28, 140.97, 137.90, 130.33, 128.43, 37.40, 35.15, 28.52, 15.72.

**2-(4-methoxyphenethyl)pyrazine (3r):**<sup>7</sup> Following the general procedure B the title

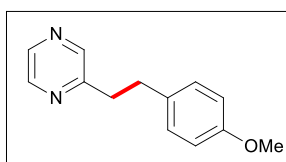

compound was isolated as light brown oil (Yield 55%).  $^1\text{H}$  NMR (400 MHz,  $\text{CDCl}_3$ )  $\delta$  8.55 – 8.52 (m, 1H), 8.42 (d,  $J = 2.4$  Hz, 1H), 8.37 (d,  $J = 1.0$  Hz, 1H), 7.10 (d,  $J = 8.5$  Hz, 2H), 6.84 (d,  $J = 8.6$  Hz, 2H), 3.80 (s, 3H), 3.13 – 3.10 (m, 2H), 3.05–3.02 (m, 2H);  $^{13}\text{C}$  NMR (100 MHz,  $\text{CDCl}_3$ )  $\delta$  158.06, 156.93, 144.81, 144.19, 142.36, 132.83, 129.44, 113.95, 55.33, 37.64, 34.67.

**2,5-diphenethylpyrazine (3t)**<sup>8</sup>: Following the general procedure A the title compound was

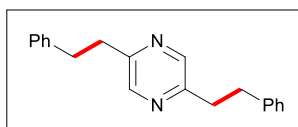

isolated as colorless solid (Yield 52%).  $^1\text{H}$  NMR (500 MHz,  $\text{CDCl}_3$ )  $\delta$  8.34 (s, 2H), 7.33 – 7.29 (m, 4H), 7.21 (dd,  $J = 11.3$ , 7.2 Hz, 6H), 3.19 – 3.14 (m, 4H), 3.13 – 3.08 (m, 4H);  $^{13}\text{C}$  NMR (100 MHz,  $\text{CDCl}_3$ )  $\delta$  154.66, 142.86, 140.91, 128.61, 128.53, 126.31, 37.11, 35.61.

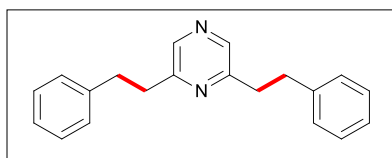

**2,6-diphenethylpyrazine (3u)**: Following the general procedure C the title compound was isolated as colorless oil (Yield 38%).  $^1\text{H}$  NMR (400 MHz,  $\text{CDCl}_3$ )  $\delta$  8.14 (s, 2H), 7.27 (dd,  $J = 11.1$ , 3.9 Hz, 4H), 7.18 (dd,  $J = 12.7$ , 7.2 Hz,

6H), 3.13 – 3.03 (m, 8H);  $^{13}\text{C}$  NMR (100 MHz,  $\text{CDCl}_3$ )  $\delta$  155.67, 141.77, 140.94, 128.46, 128.44, 126.15, 37.09, 35.44. HRMS (ESI): Calculated for  $[\text{C}_{20}\text{H}_{21}\text{N}_2]^+$  289.1699; Found 289.1700.

**2,6-bis(4-methylphenethyl)pyrazine (3v)**: Following the general procedure C the title

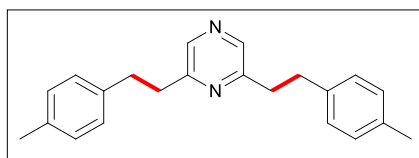

compound was isolated as colorless oil (Yield 30%).  $^1\text{H}$  NMR (400 MHz,  $\text{CDCl}_3$ )  $\delta$  8.13 (s, 2H), 7.07 – 7.04 (m, 8H), 3.10 – 3.06 (m, 4H), 3.03 – 2.99 (m, 4H), 2.30 (s, 6H);  $^{13}\text{C}$  NMR (125 MHz,  $\text{CDCl}_3$ )  $\delta$  155.76, 141.76,

137.86, 135.59, 129.12, 128.34, 37.27, 35.06, 21.00. HRMS (ESI): Calculated for  $[\text{C}_{22}\text{H}_{25}\text{N}_2]^+$  317.2012; Found 317.2014.

**[1.5] References:**

- 1 Y. Obora, S. Ogawa and N. Yamamoto, *J. Org. Chem.*, 2012, **77**, 9429–9433.
- 2 T. Feng, H. Li, D. J. Young and J. Lang, *J. Org. Chem.*, 2017, **82**, 4113–4120.
- 3 M. A. Fakhfakh, X. Franck, A. Fournet, R. Hocquemillera and B. Figadere, *Tetrahedron Letters.*, 2001, **42**, 3847–3850.
- 4 Z. Tan, H. Jiang and M. Zhang, *Chem. Commun.*, 2016, **52**, 9359.
- 5 P. Basnet, S. Thapa, D. A. Dickie and R. Giri, *Chem. Commun.*, 2016, **52**, 11072.
- 6 Y. Zhang, J. Briski, Y. Zhang, R. Rendy and D. A. Klumpp, *Org. Lett.*, 2005, **7**, 12.
- 7 B. Blank and Rhett Kempe, *J. Am. Chem. Soc.* 2010, **132**, 924–925.
- 8 H. R. Henze and J. H. Shown Jr., *J. Am. Chem. Soc.*, 1947, **69**, 1662–1666.

## [1.6] Copies of $^1\text{H}$ NMR and $^{13}\text{C}$ NMR Spectra for selected compounds

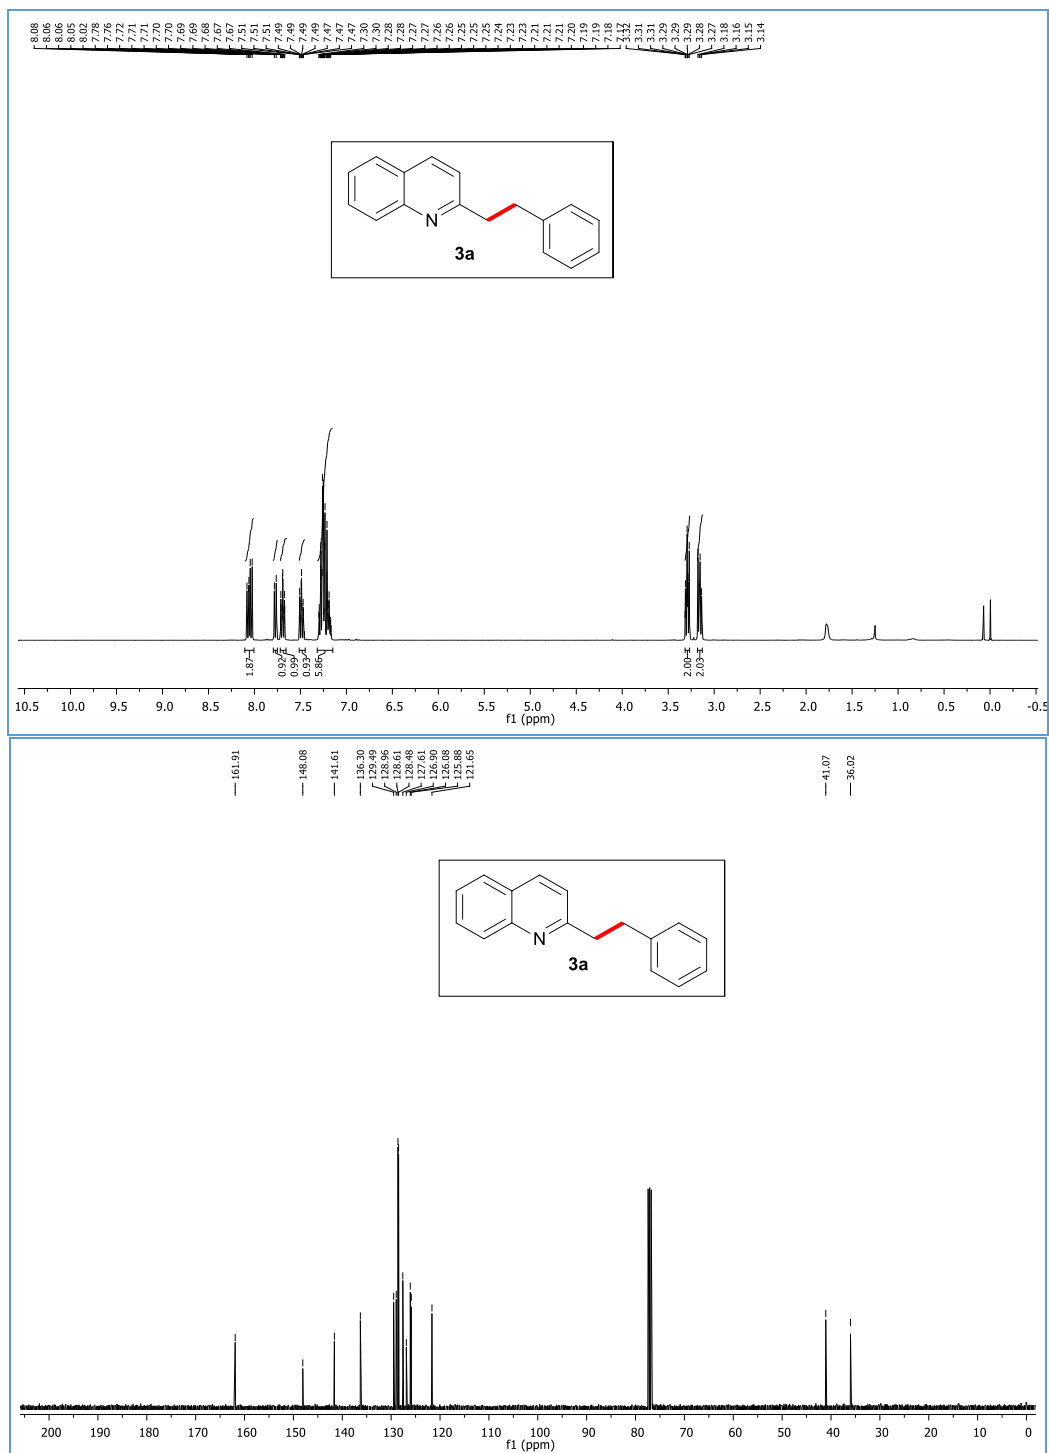

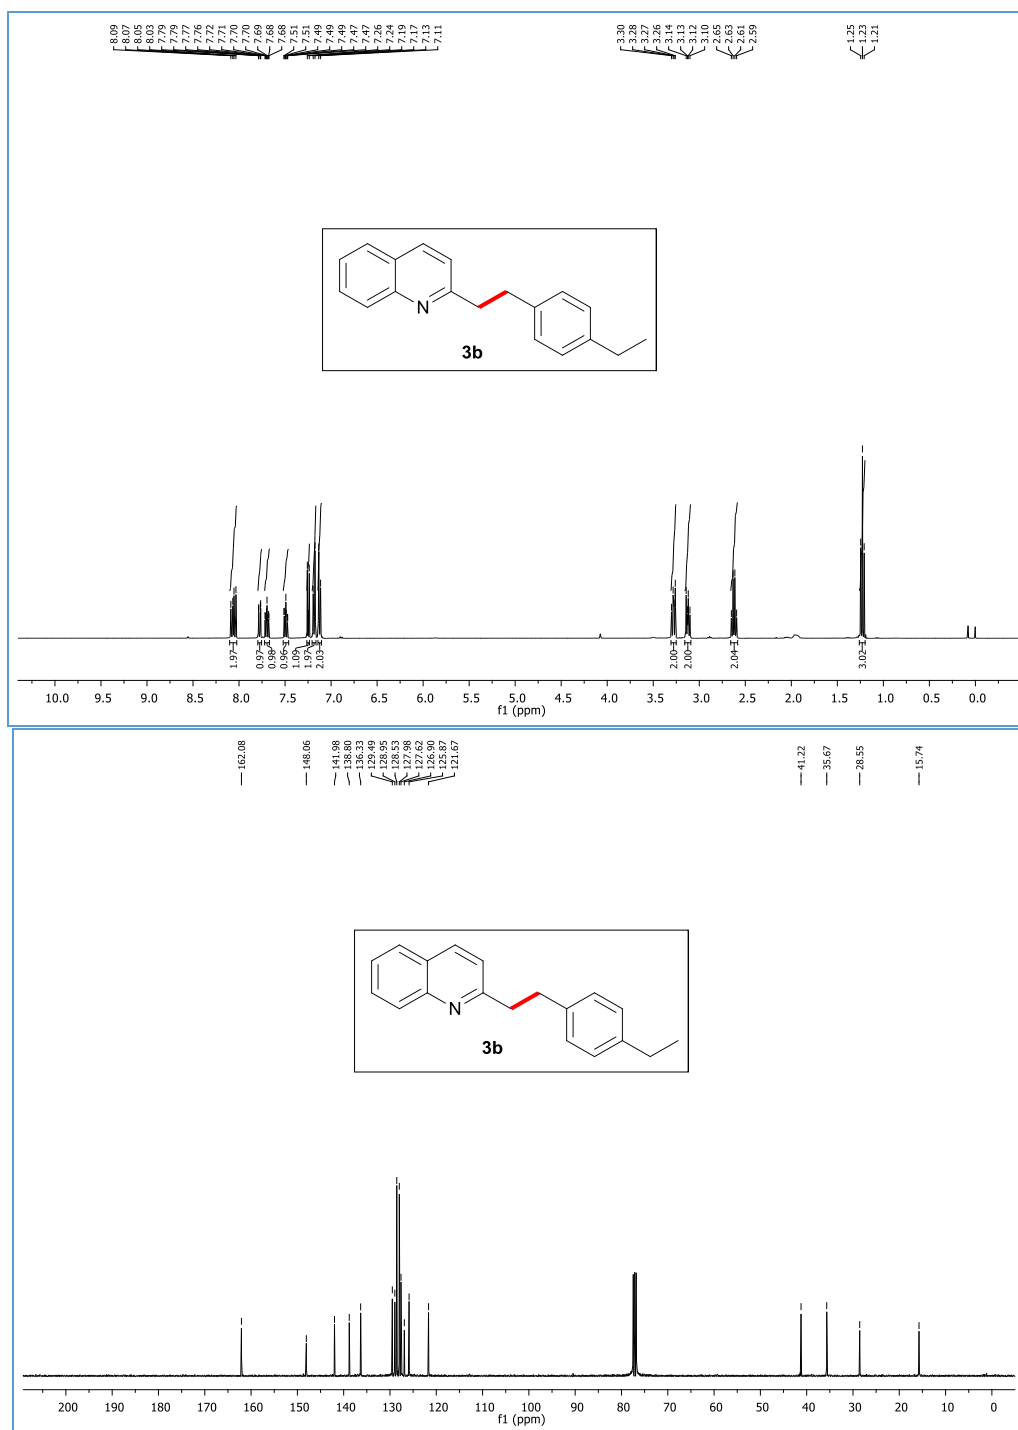

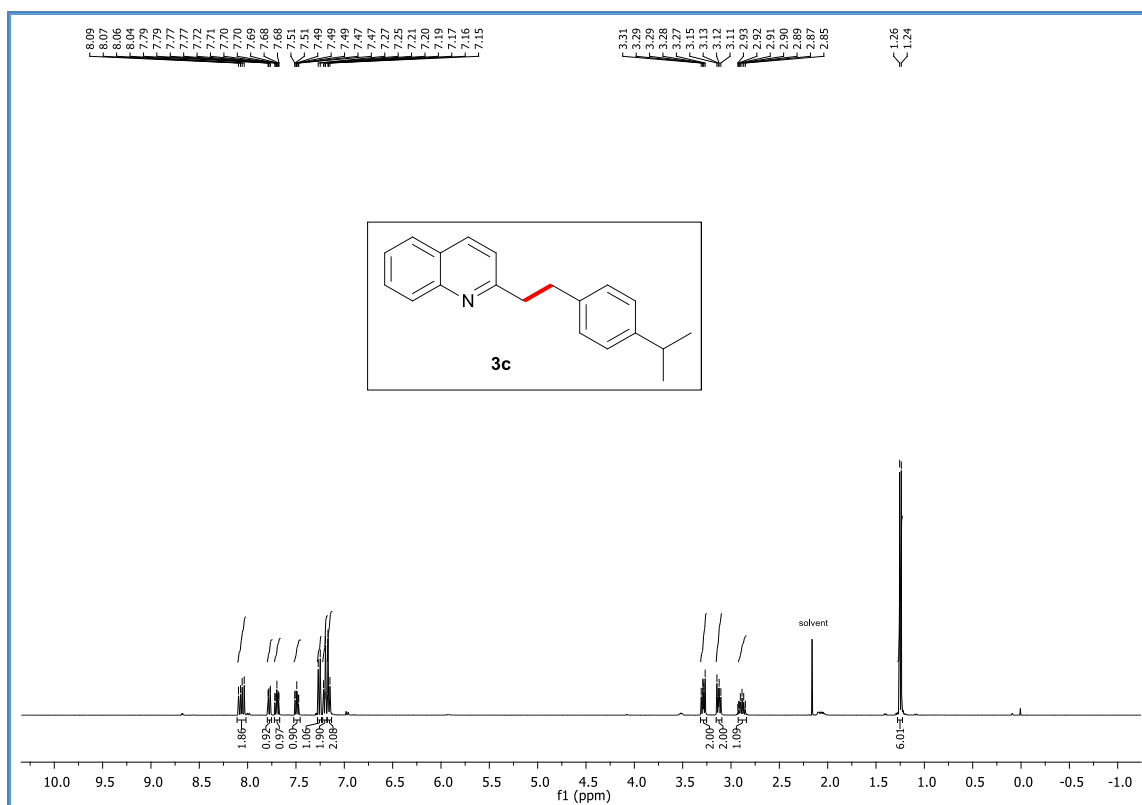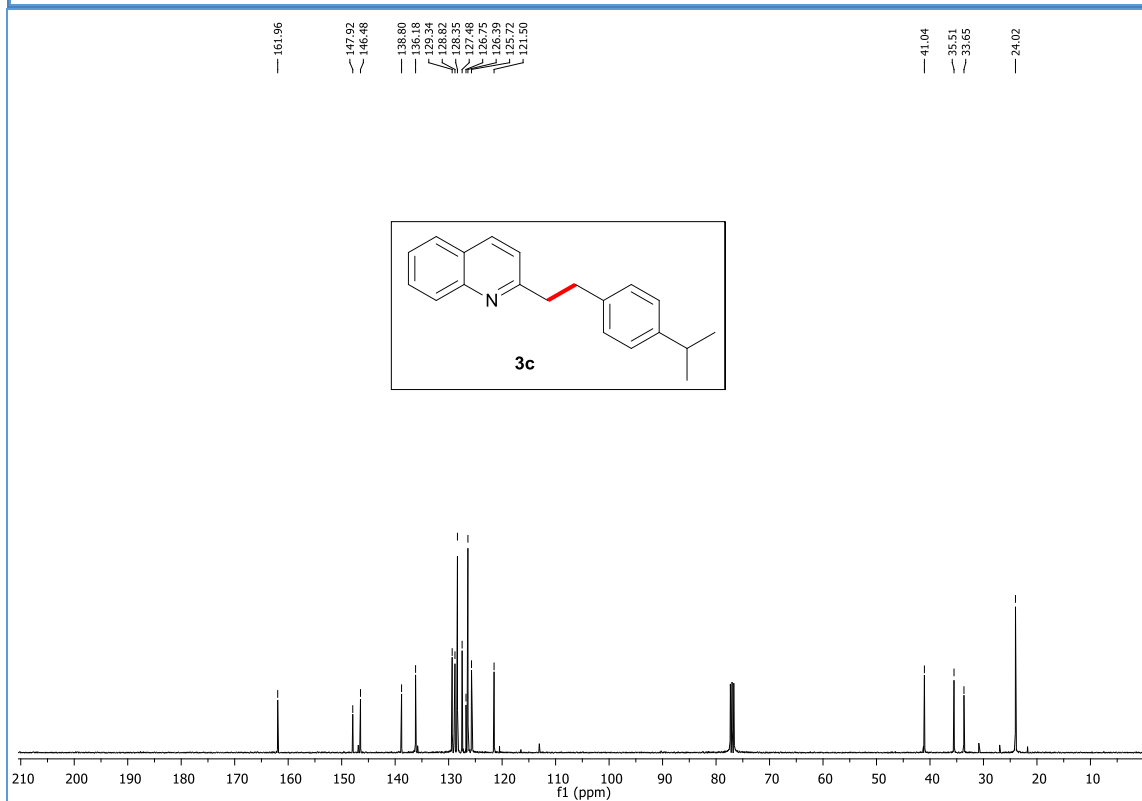



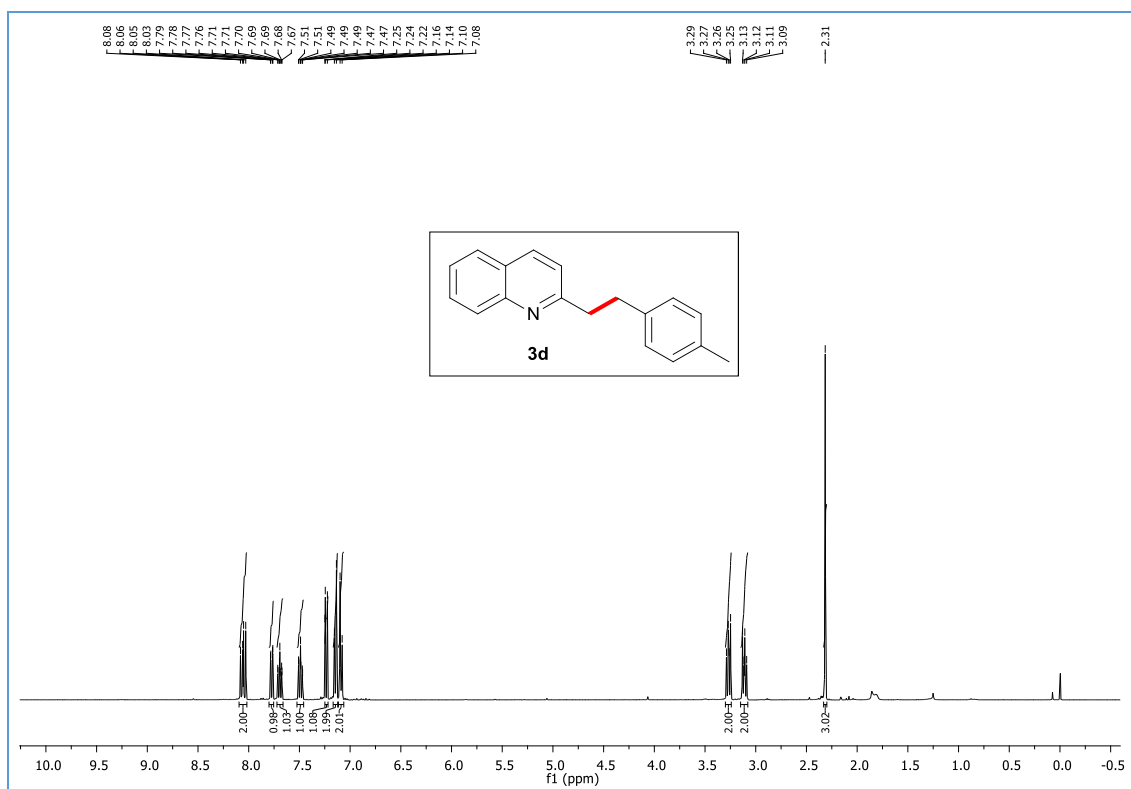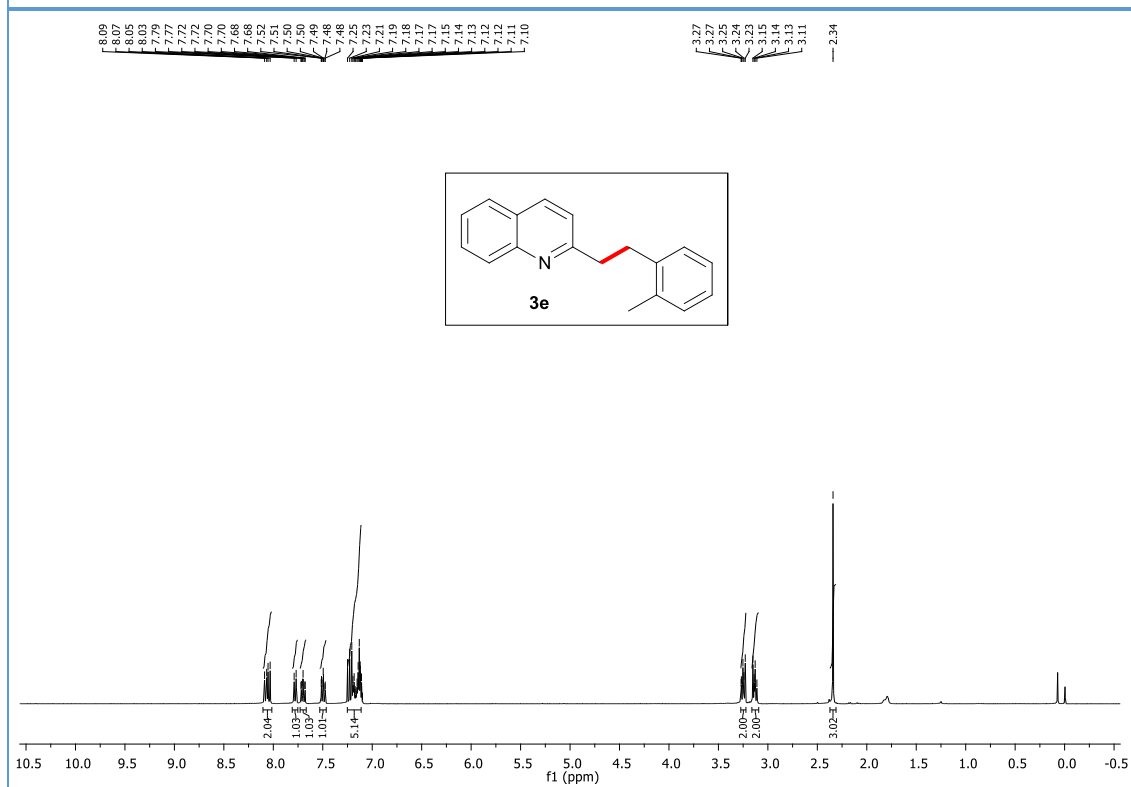

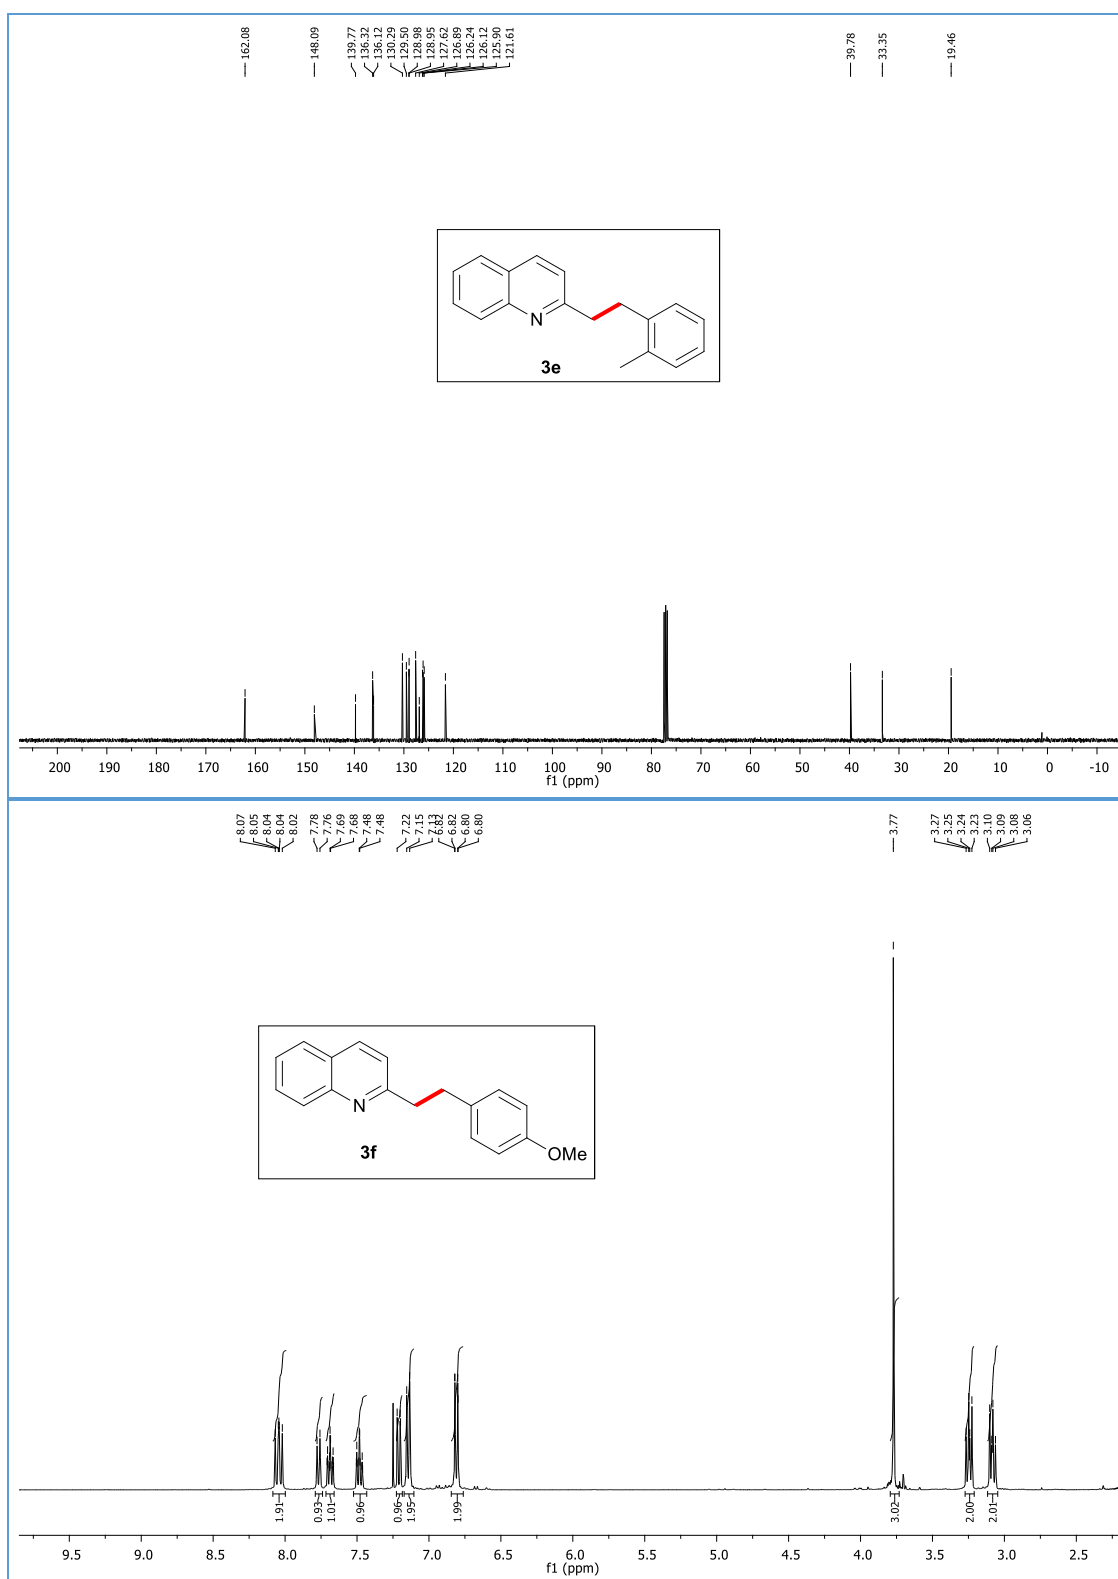

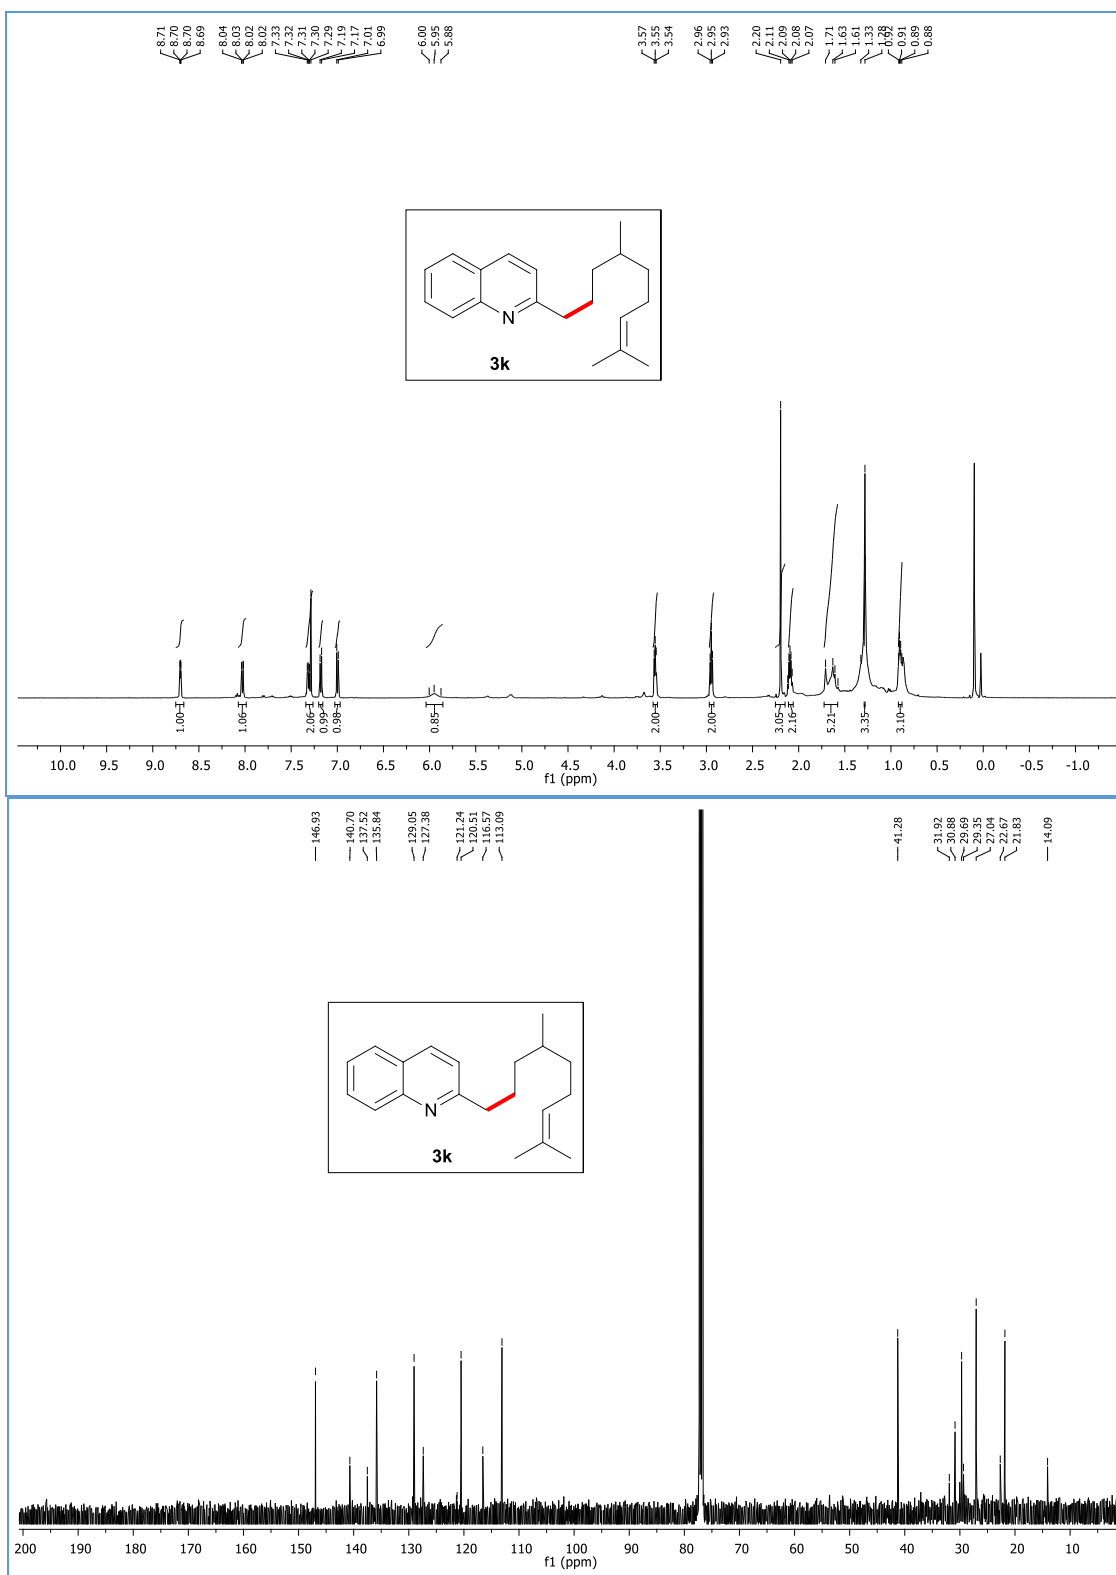

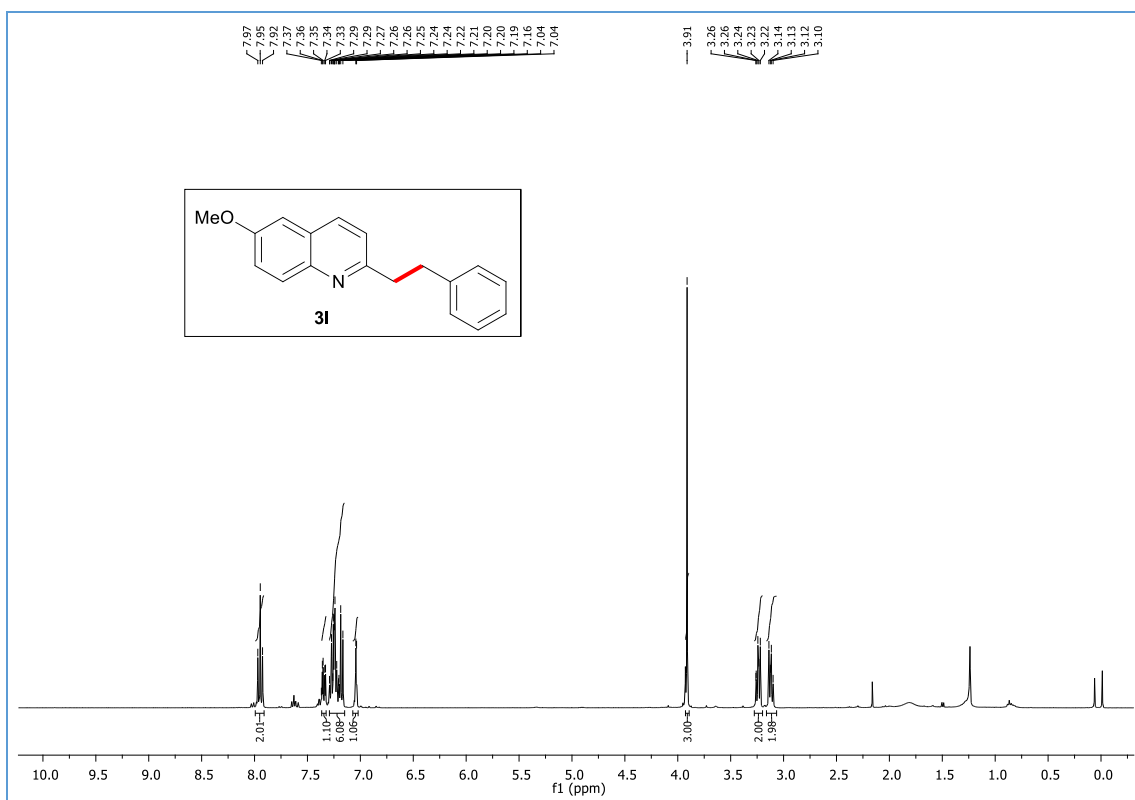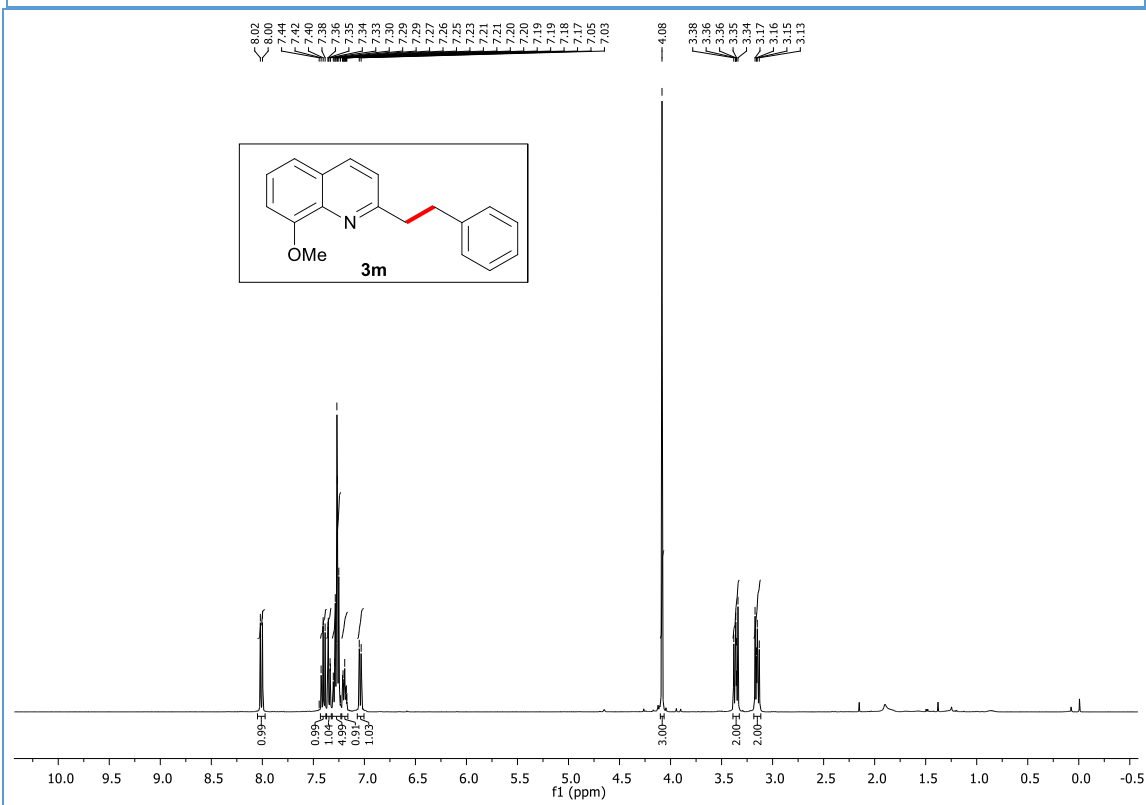

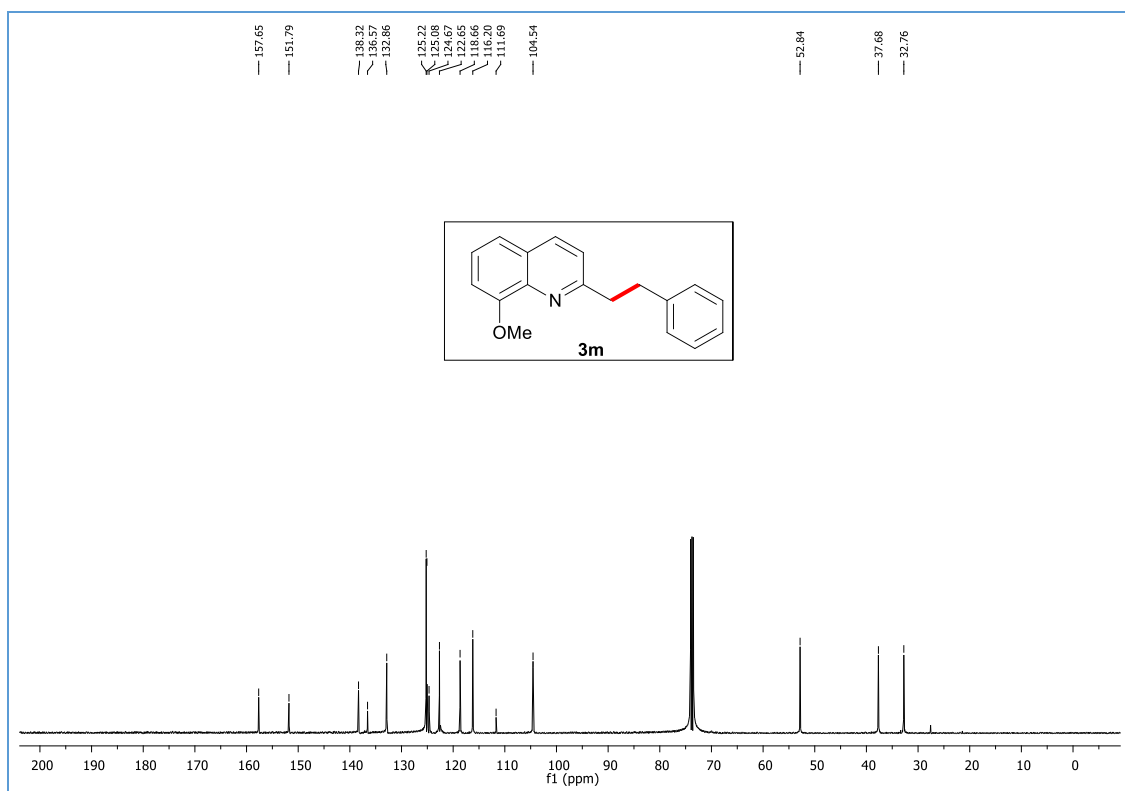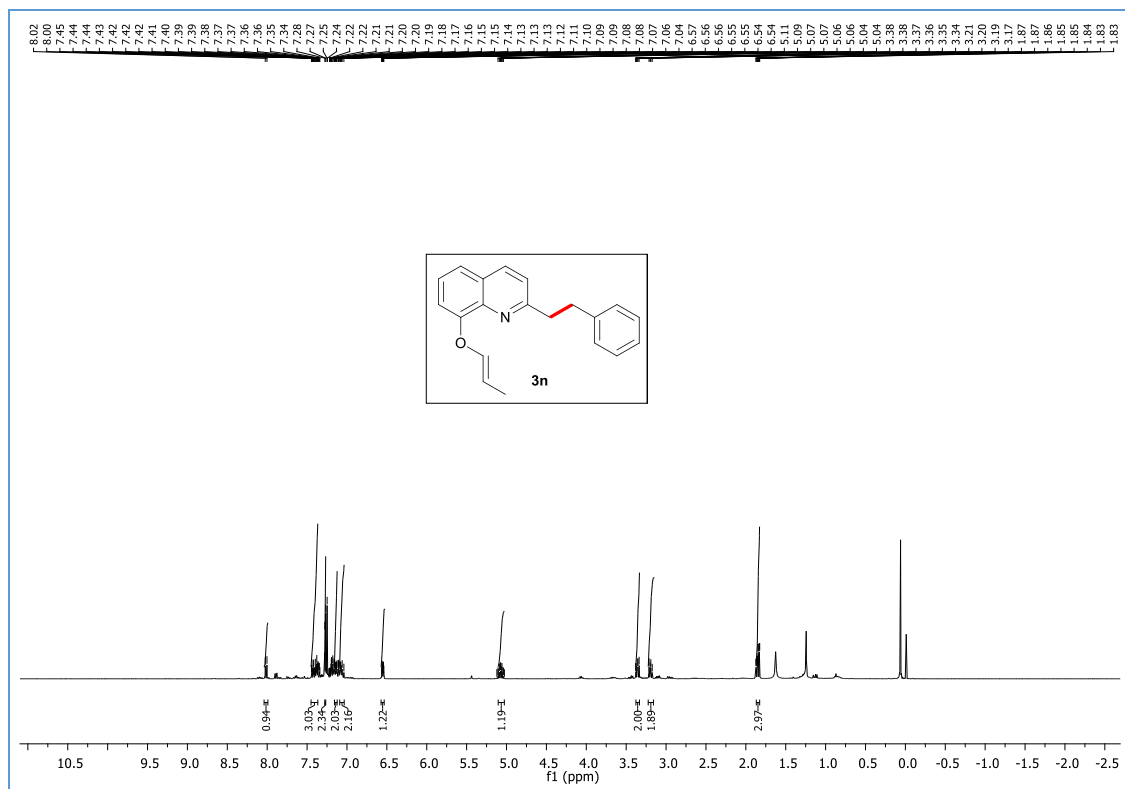

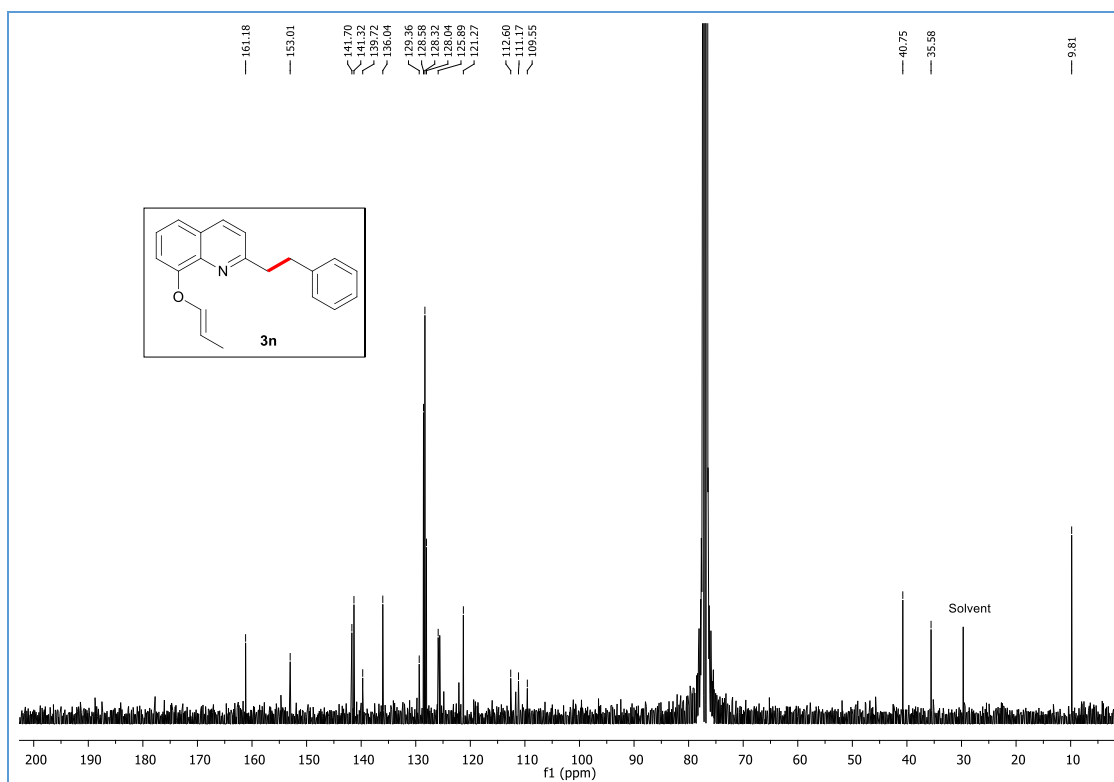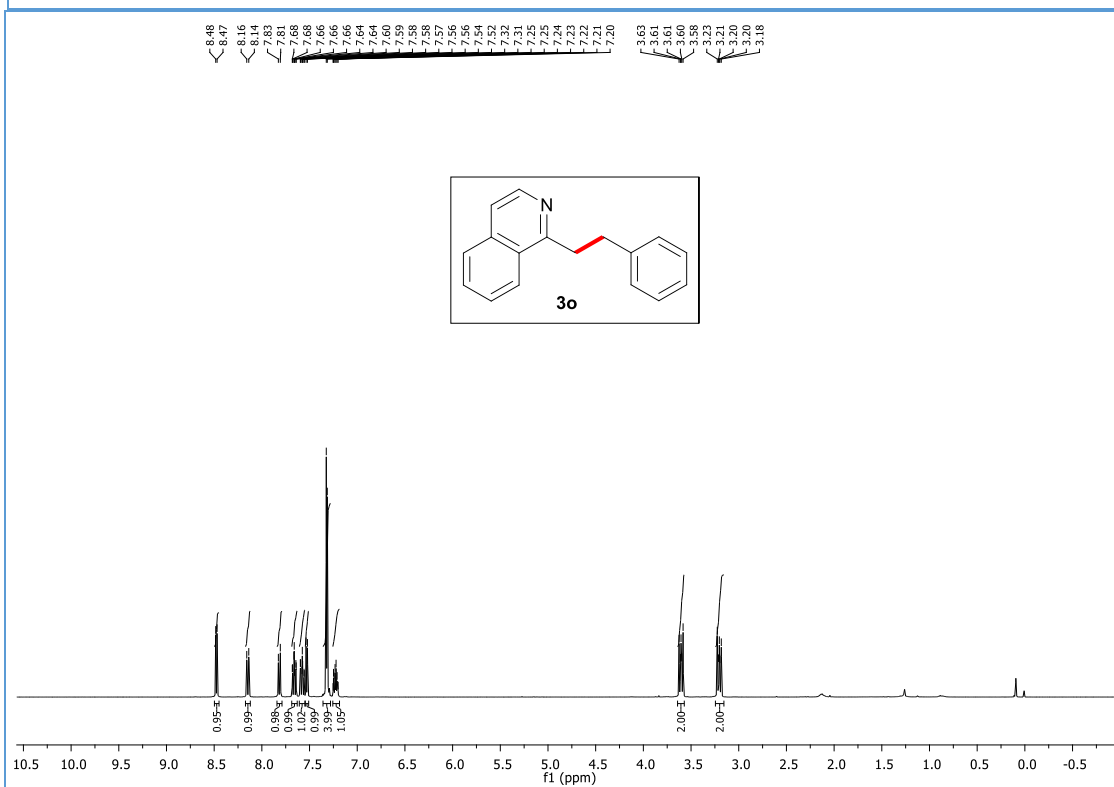

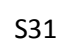

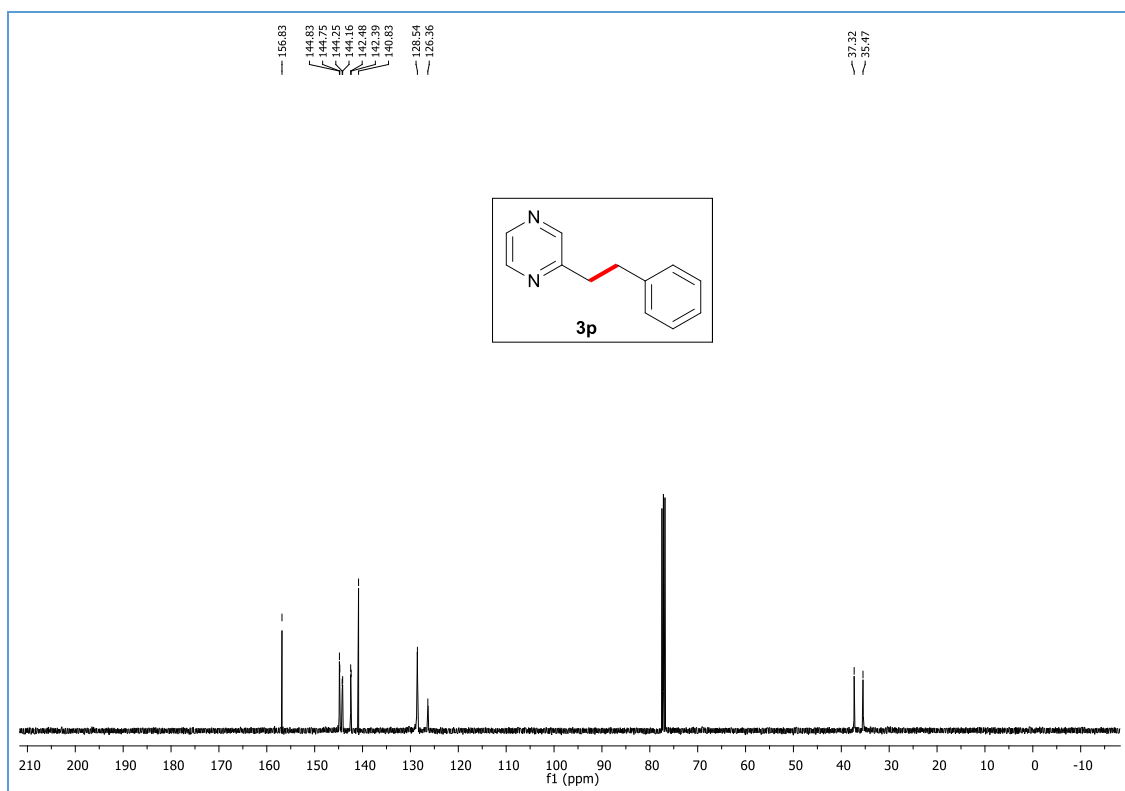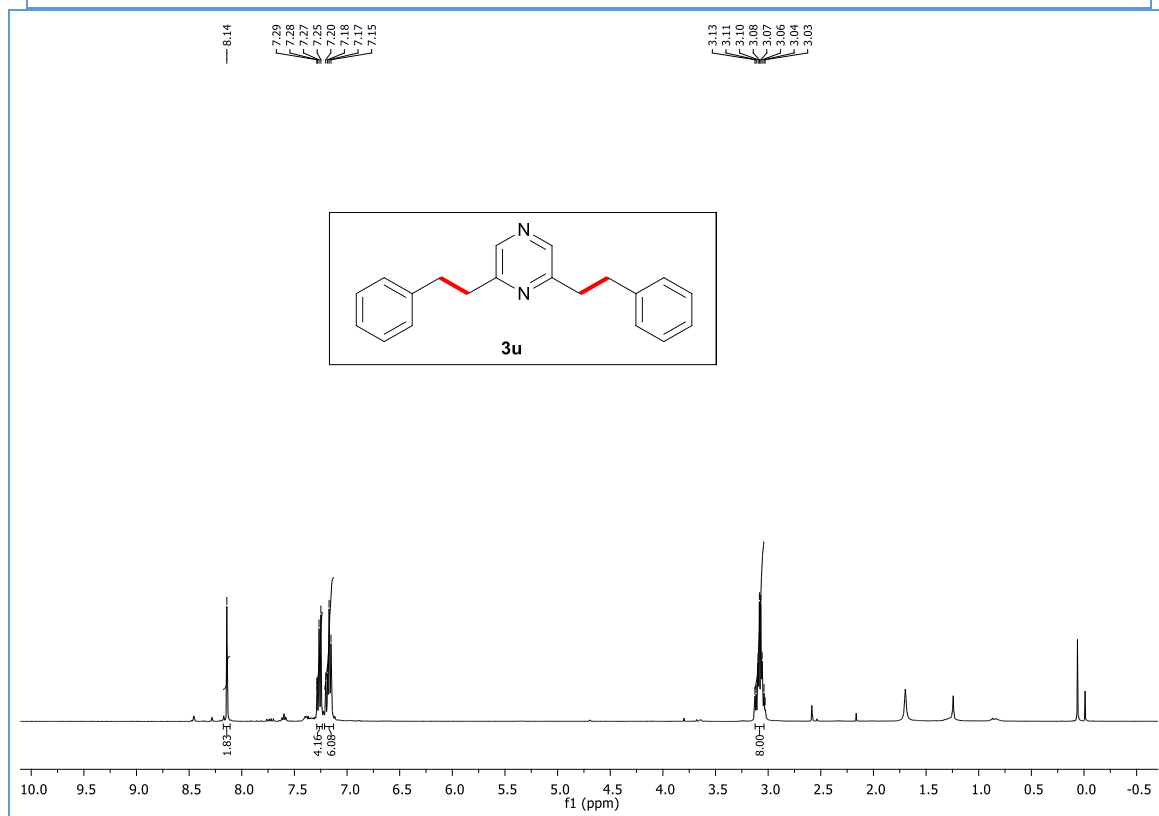



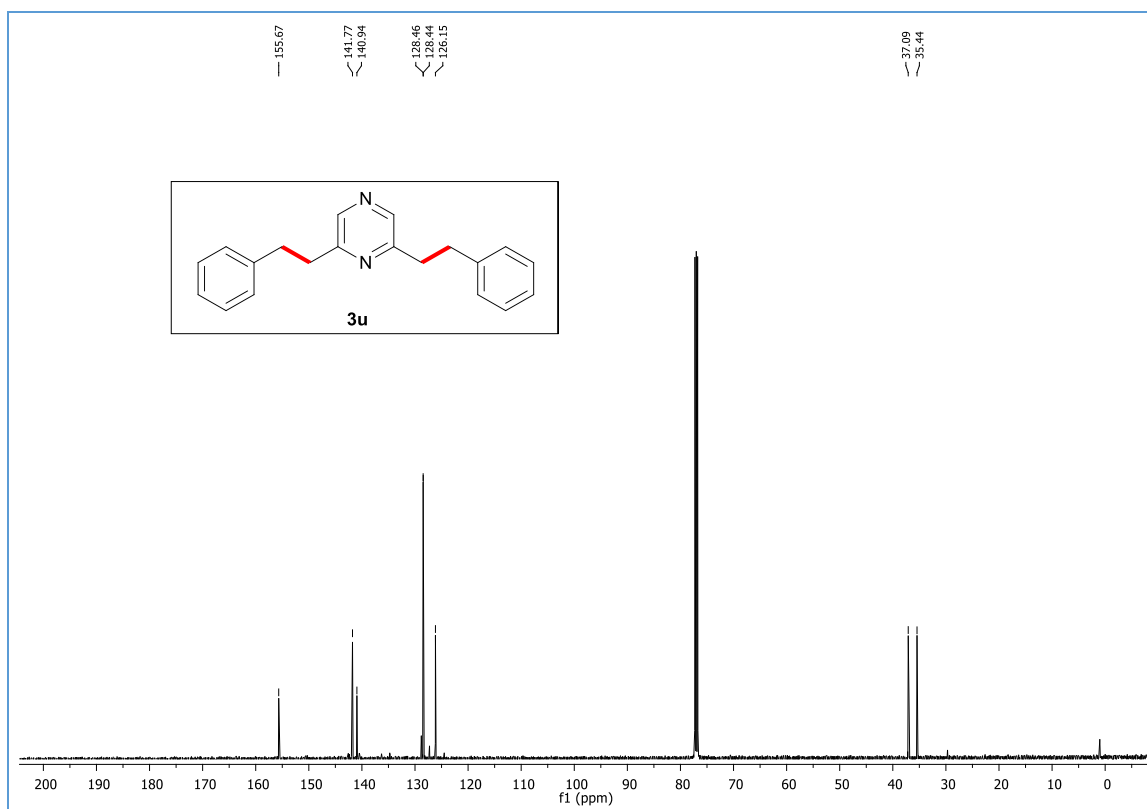

# M/E MS Zoomed Spectrum

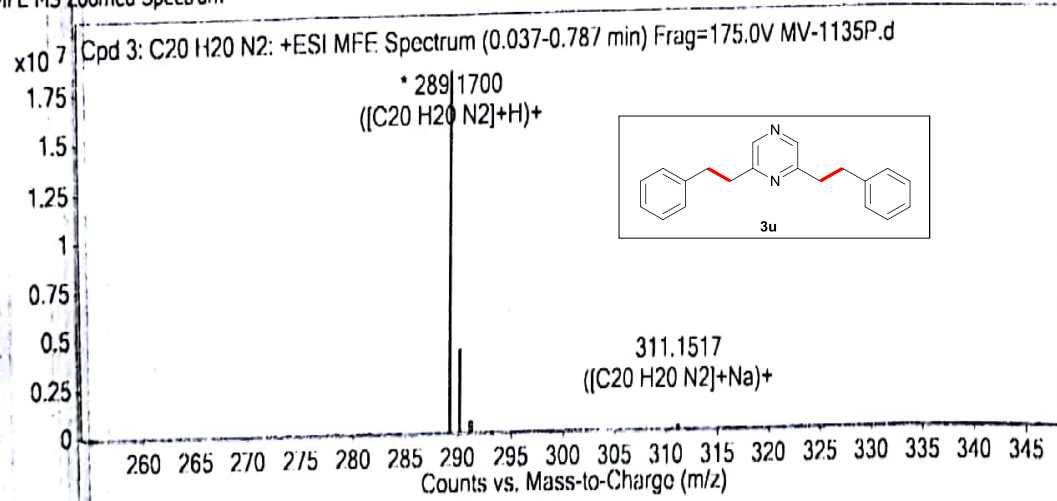

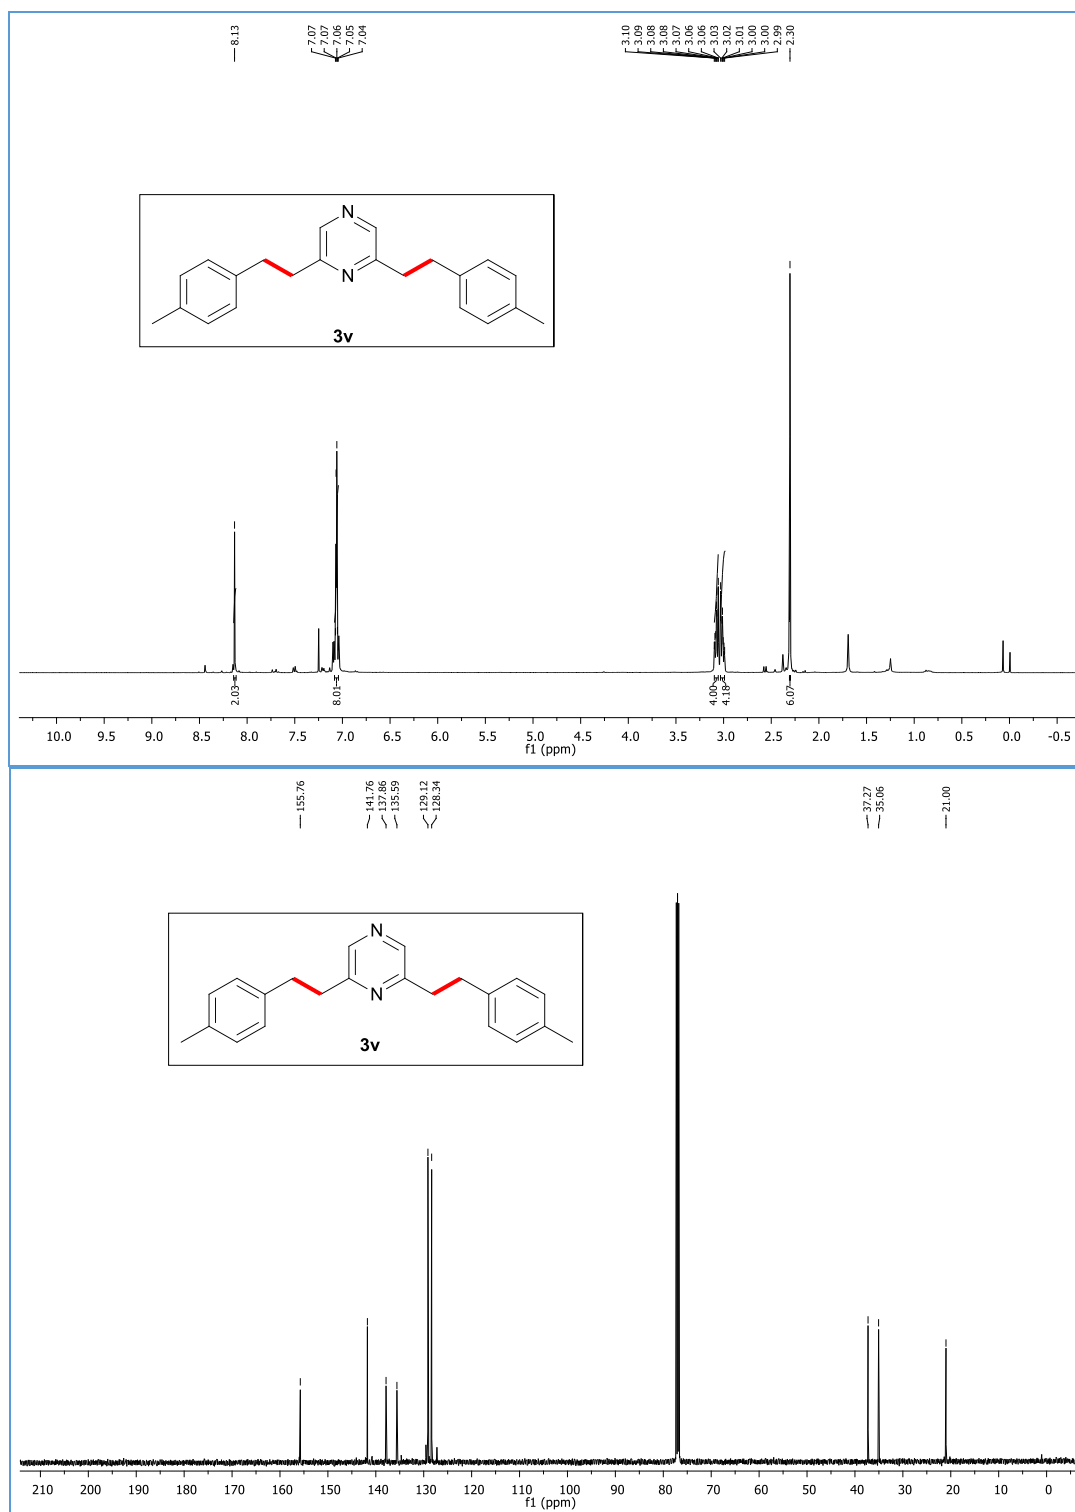

MFE MS Zoomed Spectrum

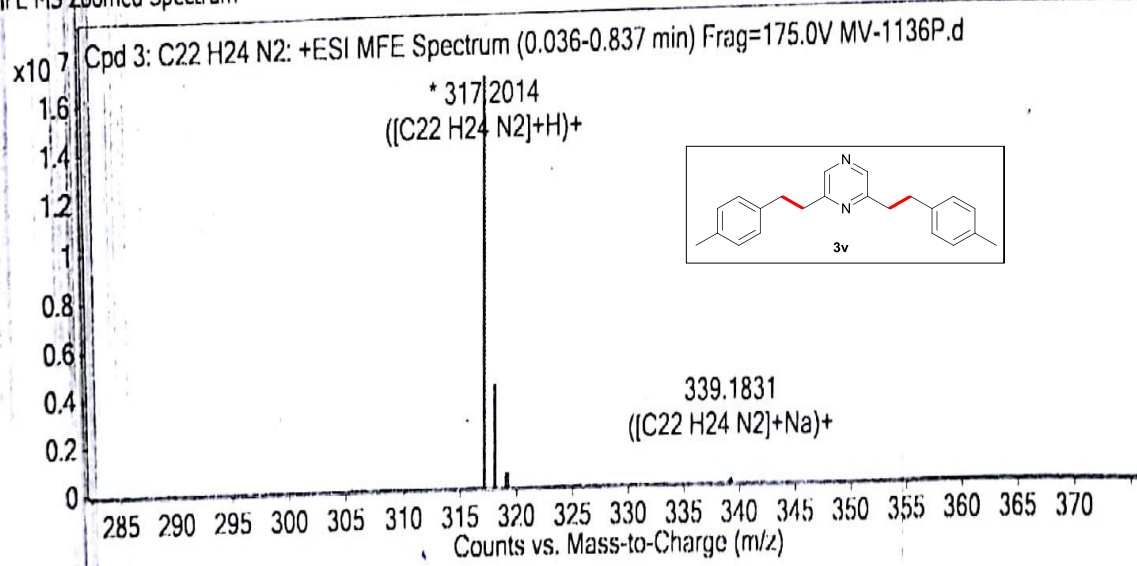

Supplement: c8cc06370b1.pdf [file c8cc06370b1.pdf]
